# Supplementary material
Source: ML conference proceedings conference paper supplement (https://proceedings.mlr.press/v209/zhou23a.html)
Supplement: Supplementary file 1 [file zhou23a-supp.pdf]

## Appendix A. Snapshot into the State of ML4H Model Evaluation

To get a snapshot of the current standards for model evaluation in machine learning for healthcare research, we manually reviewed all of the papers from the CHIL 2022 proceedings, the first 20 papers in the CHIL 2021 proceedings, and the first 20 papers that came up in the Radiology medical journal when searching for the keyword “machine learning” and filtering for papers from 2022 to 2023 (see README.md in <https://github.com/acmi-lab/EvaluationOverTime>). Out of 23 papers in the CHIL 2022 proceedings, 21 did not take time into account in their data split, and two were unclear about how they split data, but it is unlikely that they split by time. Out of the 20 papers reviewed at CHIL 2021, only one paper split by time. Out of the 20 papers reviewed from Radiology, 6 did not train or evaluate any machine learning models, but out of the remaining 14 papers, 13 did not take time into account in their data split, and one did not specify how data was split.

## Appendix B. EMDOT Python Package

Figure 6 illustrates the workflow of the EMDOT Python package.

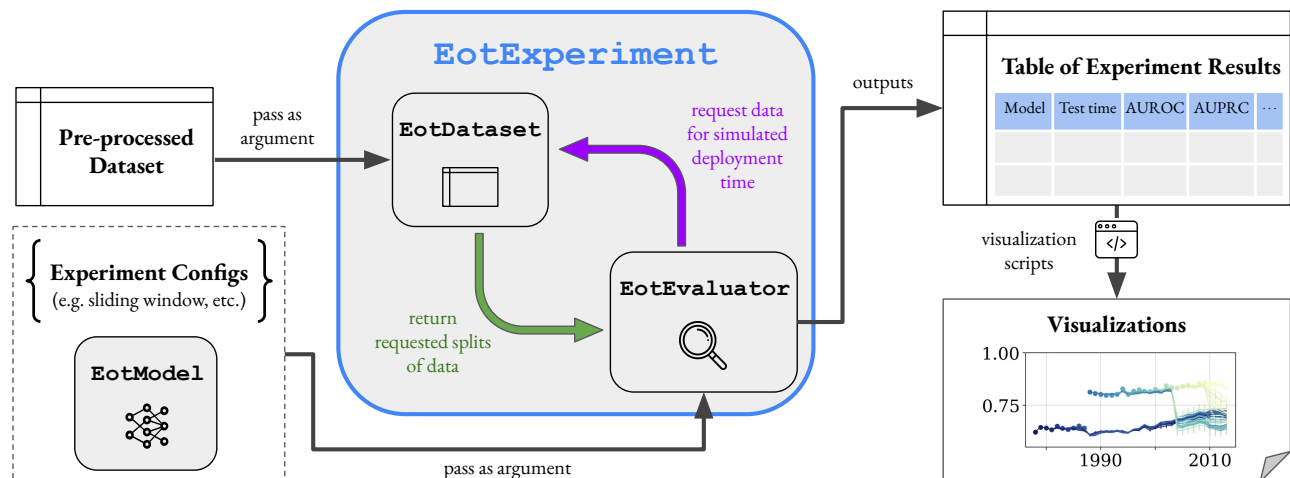

Figure 6: EMDOT Python package workflow diagram. The primary touchpoint of the EMDOT package is the `EotExperiment` object. Users provide a dataframe for their (mostly) preprocessed dataset (EMDOT takes care of normalization based on the relevant training set), their desired experiment configuration (e.g. sliding window), and model class (which should subclass the simple `EotModel` abstract class) in order to create an `EotExperiment` object. Running the `run_experiment()` function of the `EotExperiment` returns a dataframe of experiment results that can then be visualized. The diagram also provides insight into some of the internals of the `EotExperiment` object – there is an `EotDataset` object that handles data splits, and an `EotEvaluator` object that executes the main evaluation loop.

## Appendix C. Additional SEER Data Details

The Surveillance, Epidemiology, and End Results (SEER) Program collects cancer incidence data from registries throughout the U.S. This data has been used to study survival in several forms of cancer (Choi et al., 2008; Fuller et al., 2007; Taioli et al., 2015; Hegselmann et al., 2018). Each case includes demographics, primary tumor site, tumor morphology, stage and diagnosis, first course of treatment, and survival outcomes (collected with follow-up) (National Cancer Institute, 2020). The performance over time is evaluated on a *yearly* basis. We use the November 2020 version of the SEER database with nine registries (SEER 9), which covers about 9.4% of the U.S. population. While there are SEER databases that aggregate over more registries and hence cover a greater proportion of the U.S. population, we choose SEER 9 due to the large time range it covers (1975–2018).

- Data access: After filling out a Data Use Agreement and Best Practices Agreement, individuals can easily request access to the SEER dataset.
- Cohort selection: Using the SEER\*Stat software (Program, 2015), we define three cohorts of interest: (1) breast cancer, (2) colon cancer, and (3) lung cancer. We primarily follow the cohort selection procedure from Hegselmann et al. (2018), but we use SEER 9 instead of SEER 18, and use data from all available years instead of limiting to 2004–2009. Cohort selection diagrams are given in Figures 7, 8, and 9. If there are multiple samples per patient, we filter to the first entry per patient, which corresponds to when a patient first enters the dataset. This corresponds to a particular interpretation of the prediction: when a patient is first added to a cancer registry, given what we know about that patient, what is their estimated 5-year survival probability?
- Cohort characteristics: Summaries of the SEER (Breast), SEER (Colon), and SEER (Lung) cohort characteristics are in Tables 3, 4, and 5.
- Outcome definition: 5-year survival is defined by a confirmation that the patient is alive five years after the year of diagnosis.
- Features: We list the features used in the SEER breast, colon, and lung cancer datasets in Section C.2. For all datasets, we convert all categorical variables into dummy features, and apply standard scaling to numerical variables (subtract mean and divide by standard deviation).
- Missingness heat maps: are given in Figures 10, 11, 12, 13, 14, and 15.

C.1. Cohort Selection and Cohort Characteristics

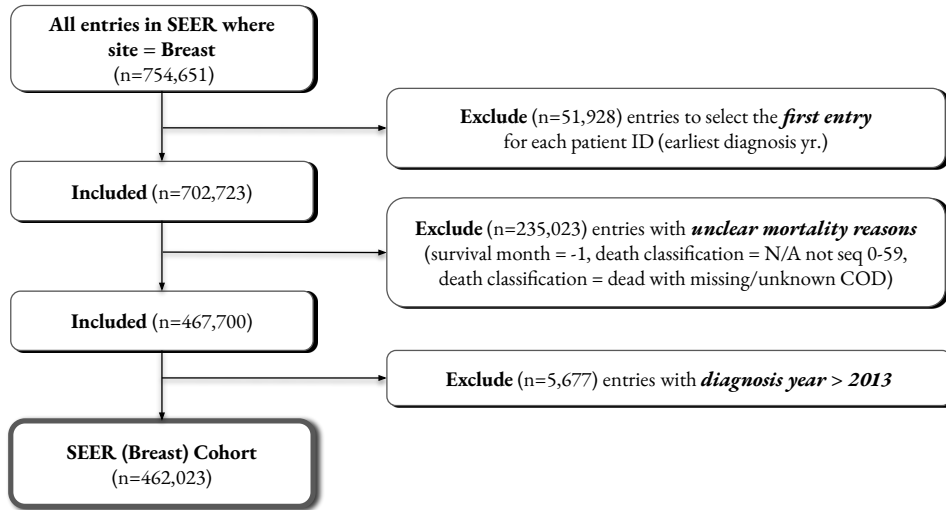

Figure 7: Cohort selection diagram - SEER (Breast)

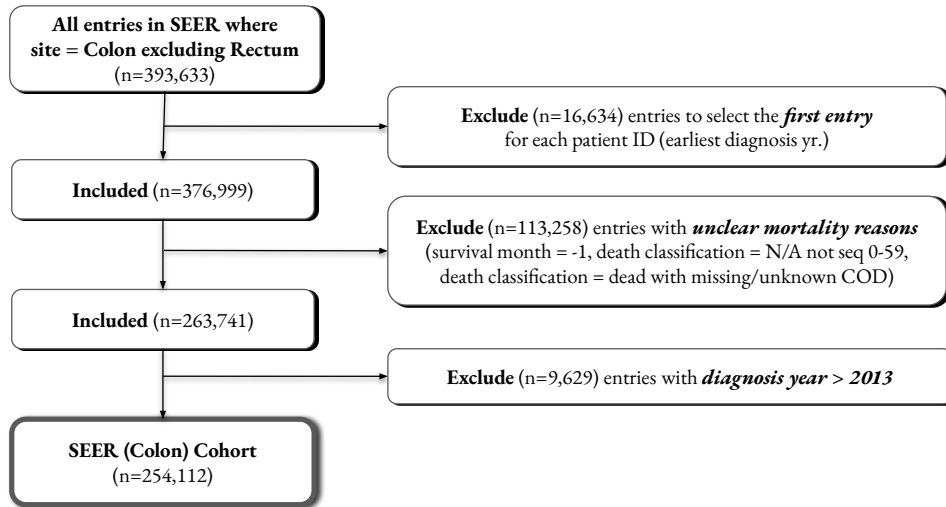

Figure 8: Cohort selection diagram - SEER (Colon)

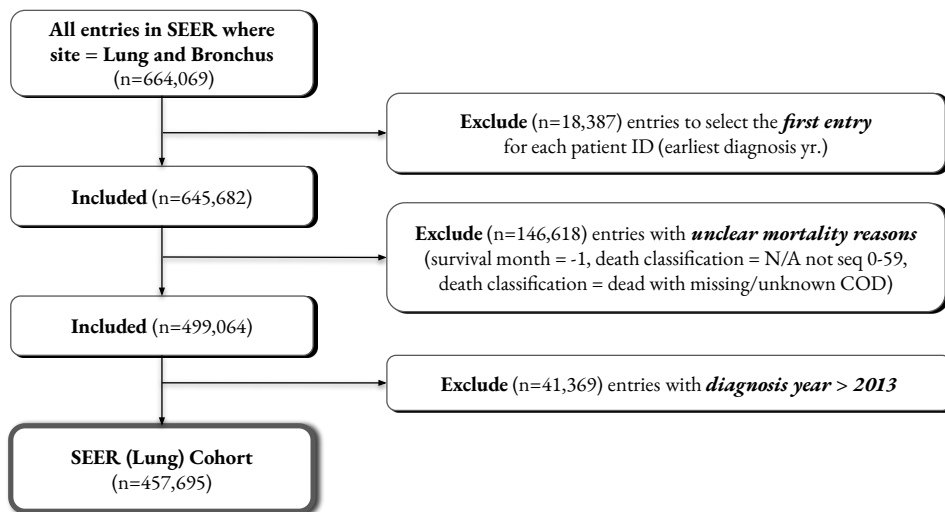

Figure 9: Cohort selection diagram - SEER (Lung)

Table 3: SEER (Breast) cohort characteristics, with count (%) or median (Q1 – Q3).

| Characteristic                                                 |                        | Missingness | Type        |
|----------------------------------------------------------------|------------------------|-------------|-------------|
| <b>Sex</b>                                                     |                        |             |             |
| Female                                                         | 459,184 (99.4%)        | –           | categorical |
| Male                                                           | 2,839 (0.6%)           | –           | categorical |
| <b>Age recode with single ages and 85+</b>                     | 60 (50-71)             | 0.0%        | continuous  |
| <b>Race/ethnicity</b>                                          |                        |             |             |
| White                                                          | 387,247 (83.8%)        | –           | categorical |
| Black                                                          | 40,217 (8.7%)          | –           | categorical |
| Other                                                          | 34,559 (7.5%)          | –           | categorical |
| <b>Laterality</b>                                              |                        |             |             |
| Right - origin of primary                                      | 224,777 (48.7%)        | –           | categorical |
| Left - origin of primary                                       | 233,549 (50.5%)        | –           | categorical |
| Other                                                          | 3,697 (0.8%)           | –           | categorical |
| <b>Regional nodes positive (1988+)</b>                         | 0 (0-3)                | 21.0%       | continuous  |
| <b>T value - based on AJCC 3rd (1988-2003)</b>                 | 10 (10-20)             | 56.2%       | categorical |
| <b>Derived AJCC T, 7th ed (2010-2015)</b>                      | 13 (13-20)             | 85.3%       | categorical |
| <b>CS site-specific factor 3 (2004-2017 varying by schema)</b> | 0 (0-2)                | 64.8%       | categorical |
| <b>Regional nodes examined (1988+)</b>                         | 8 (2-15)               | 21.0%       | continuous  |
| <b>Coding system-EOD (1973-2003)</b>                           |                        |             |             |
| Four-digit EOD (1983-1987)                                     | 44,066 (9.5%)          | –           | categorical |
| Ten-digit EOD (1988-2003)                                      | 202,450 (43.8%)        | –           | categorical |
| Thirteen-digit (expanded) site specific EOD (1973-1982)        | 52,742 (11.4%)         | –           | categorical |
| Blank(s)                                                       | 162,765 (35.2%)        | –           | categorical |
| <b>CS version input original (2004-2015)</b>                   | 10,401 (10,300-20,302) | 64.8%       | categorical |
| <b>CS version input current (2004-2015)</b>                    | 20,520 (20,510-20,540) | 64.8%       | categorical |
| <b>EOD 10 - extent (1988-2003)</b>                             | 10 (10-13)             | 56.2%       | categorical |
| <b>Grade (thru 2017)</b>                                       |                        |             |             |
| Unknown                                                        | 130,713 (28.3%)        | –           | categorical |
| Moderately differentiated; Grade II                            | 135,970 (29.4%)        | –           | categorical |
| Poorly differentiated; Grade III                               | 119,900 (26.0%)        | –           | categorical |
| Undifferentiated; anaplastic; Grade IV                         | 8,081 (1.7%)           | –           | categorical |
| Well differentiated; Grade I                                   | 67,359 (14.6%)         | –           | categorical |
| <b>SEER historic stage A (1973-2015)</b>                       |                        |             |             |
| Regional                                                       | 136,207 (29.5%)        | –           | categorical |
| Localized                                                      | 286,927 (62.1%)        | –           | categorical |
| Unstaged                                                       | 9,242 (2.0%)           | –           | categorical |
| Distant                                                        | 29,647 (6.4%)          | –           | categorical |
| <b>IHS Link</b>                                                |                        |             |             |
| Record sent for linkage, no IHS match                          | 409,058 (88.5%)        | –           | categorical |
| Record sent for linkage, IHS match                             | 1,505 (0.3%)           | –           | categorical |
| Blank(s)                                                       | 51,460 (11.1%)         | –           | categorical |
| <b>Histologic Type ICD-O-3</b>                                 | 8,500 (8,500-8,500)    | 0.0%        | categorical |
| <b>EOD 10 - size (1988-2003)</b>                               | 18 (10-30)             | 56.2%       | categorical |
| <b>Type of Reporting Source</b>                                |                        |             |             |
| Hospital inpatient/outpatient or clinic                        | 450,801 (97.6%)        | –           | categorical |
| Other                                                          | 11,222 (2.4%)          | –           | categorical |
| <b>SEER cause-specific death classification</b>                |                        |             |             |
| Alive or dead of other cause                                   | 378,758 (82.0%)        | –           | categorical |
| Dead (attributable to this cancer dx)                          | 83,265 (18.0%)         | –           | categorical |
| <b>Survival months</b>                                         | 135 (74-220)           | 0.0%        | categorical |
| <b>5-year survival</b>                                         |                        |             |             |
| 1                                                              | 378,758 (82.0%)        | –           | categorical |
| 0                                                              | 83,265 (18.0%)         | –           | categorical |

Table 4: SEER (Colon) cohort characteristics, with count (%) or median (Q1–Q3).

| Characteristic                                   |                        | Missingness | Type        |
|--------------------------------------------------|------------------------|-------------|-------------|
| <b>Sex</b>                                       |                        |             |             |
| Female                                           | 133,661 (52.6%)        | –           | categorical |
| Male                                             | 120,451 (47.4%)        | –           | categorical |
| <b>Age recode with single ages and 85+</b>       | 70 (61-79)             | 0.0%        | continuous  |
| <b>Race recode (White, Black, Other)</b>         |                        |             |             |
| White                                            | 212,265 (83.5%)        | –           | categorical |
| Black                                            | 24,041 (9.5%)          | –           | categorical |
| Other                                            | 17,806 (7.0%)          | –           | categorical |
| <b>CS version input current (2004-2015)</b>      | 20,510 (20,510-20,540) | 72.8%       | categorical |
| <b>Derived AJCC T, 6th ed (2004-2015)</b>        | 30 (20-40)             | 73.3%       | categorical |
| <b>Histology ICD-O-2</b>                         | 8,140 (8,140-8,210)    | 0.0%        | categorical |
| <b>IHS Link</b>                                  |                        |             |             |
| Record sent for linkage, no IHS match            | 208,802 (82.2%)        | –           | categorical |
| Record sent for linkage, IHS match               | 744 (0.3%)             | –           | categorical |
| Blank(s)                                         | 44,566 (17.5%)         | –           | categorical |
| <b>Histology recode - broad groupings</b>        |                        |             |             |
| 8140-8389: adenomas and adenocarcinomas          | 213,193 (83.9%)        | –           | categorical |
| 8440-8499: cystic, mucinous and serous neoplasms | 28,257 (11.1%)         | –           | categorical |
| 8010-8049: epithelial neoplasms, NOS             | 8,797 (3.5%)           | –           | categorical |
| Other                                            | 3,865 (1.5%)           | –           | categorical |
| <b>Regional nodes positive (1988+)</b>           | 1 (0-10)               | 29.8%       | continuous  |
| <b>CS mets at dx (2004-2015)</b>                 | 0 (0-22)               | 72.8%       | continuous  |
| <b>Reason no cancer-directed surgery</b>         |                        |             |             |
| Surgery performed                                | 223,929 (88.1%)        | –           | categorical |
| Not recommended                                  | 13,003 (5.1%)          | –           | categorical |
| Other                                            | 17,180 (6.8%)          | –           | categorical |
| <b>Derived AJCC T, 6th ed (2004-2015)</b>        | 30 (20-40)             | 73.3%       | categorical |
| <b>CS version input original (2004-2015)</b>     | 10,401 (10,300-20,302) | 72.8%       | categorical |
| <b>Primary Site</b>                              | 184 (182-187)          | 0.0%        | categorical |
| <b>Diagnostic Confirmation</b>                   |                        |             |             |
| Positive histology                               | 244,616 (96.3%)        | –           | categorical |
| Radiography without microscopic confirm          | 4,822 (1.9%)           | –           | categorical |
| Other                                            | 4,674 (1.8%)           | –           | categorical |
| <b>EOD 10 - extent (1988-2003)</b>               | 45 (40-85)             | 57.0%       | categorical |
| <b>Histologic Type ICD-O-3</b>                   | 8,140 (8,140-8,210)    | 0.0%        | categorical |
| <b>EOD 10 - size (1988-2003)</b>                 | 55 (35-999)            | 57.0%       | categorical |
| <b>CS lymph nodes (2004-2015)</b>                | 0 (0-210)              | 72.8%       | categorical |
| <b>SEER cause-specific death classification</b>  |                        |             |             |
| Dead (attributable to this cancer dx)            | 119,047 (46.8%)        | –           | categorical |
| Alive or dead of other cause                     | 135,065 (53.2%)        | –           | categorical |
| <b>Survival months</b>                           | 68 (12-151)            | 0.0%        | categorical |
| <b>5-year survival</b>                           |                        |             |             |
| 1                                                | 135,065 (53.2%)        | –           | categorical |
| 0                                                | 119,047 (46.8%)        | –           | categorical |

Table 5: SEER (Lung) cohort characteristics, with count (%) or median (Q1 – Q3).

| Characteristic                                        |                        | Missingness | Type        |
|-------------------------------------------------------|------------------------|-------------|-------------|
| <b>Sex</b>                                            |                        |             |             |
| Female                                                | 187,967 (41.1%)        | –           | categorical |
| Male                                                  | 269,728 (58.9%)        | –           | categorical |
| <b>Age recode with single ages and 85+</b>            | 68 (60-76)             | 0.0%        | continuous  |
| <b>Race recode (White, Black, Other)</b>              |                        |             |             |
| White                                                 | 384,184 (83.9%)        | –           | categorical |
| Black                                                 | 47,237 (10.3%)         | –           | categorical |
| Other                                                 | 26,274 (5.7%)          | –           | categorical |
| <b>Histologic Type ICD-O-3</b>                        | 8,070 (8,041-8,140)    | 0.0%        | categorical |
| <b>Laterality</b>                                     |                        |             |             |
| Left - origin of primary                              | 178,661 (39.0%)        | –           | categorical |
| Right - origin of primary                             | 245,321 (53.6%)        | –           | categorical |
| Paired site, but no information concerning laterality | 23,196 (5.1%)          | –           | categorical |
| Other                                                 | 10,517 (2.3%)          | –           | categorical |
| <b>EOD 10 - nodes (1988-2003)</b>                     | 2 (1-9)                | 56.3%       | categorical |
| <b>EOD 4 - nodes (1983-1987)</b>                      | 3 (0-9)                | 88.4%       | categorical |
| <b>Type of Reporting Source</b>                       |                        |             |             |
| Hospital inpatient/outpatient or clinic               | 445,606 (97.4%)        | –           | categorical |
| Other                                                 | 12,089 (2.6%)          | –           | categorical |
| <b>SEER historic stage A (1973-2015)</b>              |                        |             |             |
| Regional                                              | 79,409 (17.3%)         | –           | categorical |
| Distant                                               | 182,467 (39.9%)        | –           | categorical |
| Blank(s)                                              | 123,161 (26.9%)        | –           | categorical |
| Localized                                             | 50,375 (11.0%)         | –           | categorical |
| Unstaged                                              | 22,283 (4.9%)          | –           | categorical |
| <b>CS version input current (2004-2015)</b>           | 20,520 (20,510-20,540) | 70.6%       | categorical |
| <b>CS mets at dx (2004-2015)</b>                      | 23 (0-40)              | 70.6%       | continuous  |
| <b>CS version input original (2004-2015)</b>          | 10,401 (10,300-20,302) | 70.6%       | categorical |
| <b>CS tumor size (2004-2015)</b>                      | 50 (29-999)            | 70.6%       | categorical |
| <b>EOD 10 - size (1988-2003)</b>                      | 80 (35-999)            | 56.3%       | categorical |
| <b>CS lymph nodes (2004-2015)</b>                     | 200 (0-200)            | 70.6%       | categorical |
| <b>Histology recode - broad groupings</b>             |                        |             |             |
| 8140-8389: adenomas and adenocarcinomas               | 147,127 (32.1%)        | –           | categorical |
| 8010-8049: epithelial neoplasms, NOS                  | 179,848 (39.3%)        | –           | categorical |
| 8440-8499: cystic, mucinous and serous neoplasms      | 6,266 (1.4%)           | –           | categorical |
| Other                                                 | 124,454 (27.2%)        | –           | categorical |
| <b>EOD 10 - extent (1988-2003)</b>                    | 78 (40-85)             | 56.3%       | categorical |
| <b>SEER cause-specific death classification</b>       |                        |             |             |
| Alive or dead of other cause                          | 49,997 (10.9%)         | –           | categorical |
| Dead (attributable to this cancer dx)                 | 407,698 (89.1%)        | –           | categorical |
| <b>Survival months</b>                                | 7 (2-19)               | 0.0%        | categorical |
| <b>5-year survival</b>                                |                        |             |             |
| 1                                                     | 49,997 (10.9%)         | –           | categorical |
| 0                                                     | 407,698 (89.1%)        | –           | categorical |

## C.2. Features

### SEER (Breast):

AJCC stage 3rd edition (1988-2003)  
 AYA site recode/WHO 2008  
 Age recode with single ages and 85+  
 Behavior code ICD-0-2  
 Behavior code ICD-0-3  
 Behavior recode for analysis  
 Breast - Adjusted AJCC 6th M (1988-2015)  
 Breast - Adjusted AJCC 6th N (1988-2015)  
 Breast - Adjusted AJCC 6th Stage (1988-2015)  
 Breast - Adjusted AJCC 6th T (1988-2015)  
 Breast Subtype (2010+)  
 CS Schema - AJCC 6th Edition  
 CS extension (2004-2015)  
 CS lymph nodes (2004-2015)  
 CS mets at dx (2004-2015)  
 CS site-specific factor 1 (2004-2017 varying by schema)  
 CS site-specific factor 15 (2004-2017 varying by schema)  
 CS site-specific factor 2 (2004-2017 varying by schema)  
 CS site-specific factor 25 (2004-2017 varying by schema)  
 CS site-specific factor 3 (2004-2017 varying by schema)  
 CS site-specific factor 4 (2004-2017 varying by schema)  
 CS site-specific factor 5 (2004-2017 varying by schema)  
 CS site-specific factor 6 (2004-2017 varying by schema)  
 CS site-specific factor 7 (2004-2017 varying by schema)  
 CS tumor size (2004-2015)  
 CS version derived (2004-2015)  
 CS version input current (2004-2015)  
 CS version input original (2004-2015)  
 Coding system-EDD (1973-2003)  
 Derived AJCC M, 6th ed (2004-2015)  
 Derived AJCC M, 7th ed (2010-2015)  
 Derived AJCC N, 6th ed (2004-2015)  
 Derived AJCC N, 7th ed (2010-2015)  
 Derived AJCC Stage Group, 6th ed (2004-2015)  
 Derived AJCC Stage Group, 7th ed (2010-2015)  
 Derived AJCC T, 6th ed (2004-2015)  
 Derived AJCC T, 7th ed (2010-2015)  
 Derived HER2 Recode (2010+)  
 EDD 10 - extent (1988-2003)  
 EDD 10 - nodes (1988-2003)  
 EDD 10 - size (1988-2003)  
 ER Status Recode Breast Cancer (1990+)  
 First malignant primary indicator  
 Grade (thru 2017)  
 Histologic Type ICD-0-3  
 Histology recode - Brain groupings  
 Histology recode - broad groupings  
 ICC site rec extended ICD-0-3/WHO 2008  
 IHS Link  
 Laterality  
 Lymphoma subtype recode/WHO 2008 (thru 2017)  
 M value - based on AJCC 3rd (1988-2003)  
 N value - based on AJCC 3rd (1988-2003)  
 Origin recode NHIA (Hispanic, Non-Hisp)  
 PR Status Recode Breast Cancer (1990+)  
 Primary Site  
 Primary by international rules  
 Race recode (W, B, AI, API)  
 Race recode (White, Black, Other)  
 Race/ethnicity  
 Regional nodes examined (1988+)  
 Regional nodes positive (1988+)  
 SEER historic stage A (1973-2015)  
 SEER modified AJCC stage 3rd (1988-2003)  
 Sex  
 Site recode ICD-0-3/WHO 2008  
 T value - based on AJCC 3rd (1988-2003)  
 Tumor marker 1 (1990-2003)  
 Tumor marker 2 (1990-2003)  
 Tumor marker 3 (1998-2003)  
 Type of Reporting Source

### SEER (Colon):

Age recode with <1 year olds  
 Age recode with single ages and 85+  
 Behavior code ICD-0-2  
 Behavior code ICD-0-3  
 CS extension (2004-2015)  
 CS lymph nodes (2004-2015)  
 CS mets at dx (2004-2015)  
 CS site-specific factor 1 (2004-2017 varying by schema)  
 CS tumor size (2004-2015)  
 CS version input current (2004-2015)  
 CS version input original (2004-2015)  
 Derived AJCC M, 6th ed (2004-2015)  
 Derived AJCC M, 7th ed (2010-2015)  
 Derived AJCC N, 6th ed (2004-2015)  
 Derived AJCC N, 7th ed (2010-2015)  
 Derived AJCC Stage Group, 6th ed (2004-2015)  
 Derived AJCC Stage Group, 7th ed (2010-2015)  
 Derived AJCC T, 6th ed (2004-2015)  
 Derived AJCC T, 7th ed (2010-2015)  
 Diagnostic Confirmation  
 EDD 10 - extent (1988-2003)  
 EDD 10 - nodes (1988-2003)

EDD 10 - size (1988-2003)  
 Histologic Type ICD-0-3  
 Histology ICD-0-2  
 Histology recode - broad groupings  
 IHS Link  
 Origin recode NHIA (Hispanic, Non-Hisp)  
 Primary Site  
 Primary by international rules  
 RX Summ--Surg Prim Site (1998+)  
 Race recode (White, Black, Other)  
 Reason no cancer-directed surgery  
 Regional nodes positive (1988+)  
 SEER modified AJCC stage 3rd (1988-2003)  
 Sex

### SEER (Lung):

AYA site recode/WHO 2008  
 Age recode with <1 year olds  
 Age recode with single ages and 85+  
 Behavior code ICD-0-2  
 Behavior code ICD-0-3  
 CS extension (2004-2015)  
 CS lymph nodes (2004-2015)  
 CS mets at dx (2004-2015)  
 CS site-specific factor 1 (2004-2017 varying by schema)  
 CS tumor size (2004-2015)  
 CS version input current (2004-2015)  
 CS version input original (2004-2015)  
 Derived AJCC M, 6th ed (2004-2015)  
 Derived AJCC M, 7th ed (2010-2015)  
 Derived AJCC N, 6th ed (2004-2015)  
 Derived AJCC N, 7th ed (2010-2015)  
 Derived AJCC Stage Group, 6th ed (2004-2015)  
 Derived AJCC T, 6th ed (2004-2015)  
 Derived AJCC T, 7th ed (2010-2015)  
 EDD 10 - extent (1988-2003)  
 EDD 10 - nodes (1988-2003)  
 EDD 10 - size (1988-2003)  
 EDD 4 - nodes (1983-1987)  
 First malignant primary indicator  
 Grade (thru 2017)  
 Histologic Type ICD-0-3  
 Histology recode - broad groupings  
 ICC site recode 3rd edition/IARC 2017  
 ICC site recode extended 3rd edition/IARC 2017  
 IHS Link  
 Laterality  
 Origin recode NHIA (Hispanic, Non-Hisp)  
 Primary by international rules  
 Race recode (White, Black, Other)  
 SEER historic stage A (1973-2015)  
 Sex  
 Type of Reporting Source



### C.3. Missingness heatmaps

This section plots missingness heatmaps of categorical and numerical features in each SEER dataset over time. Darker color means larger proportion of missing data.

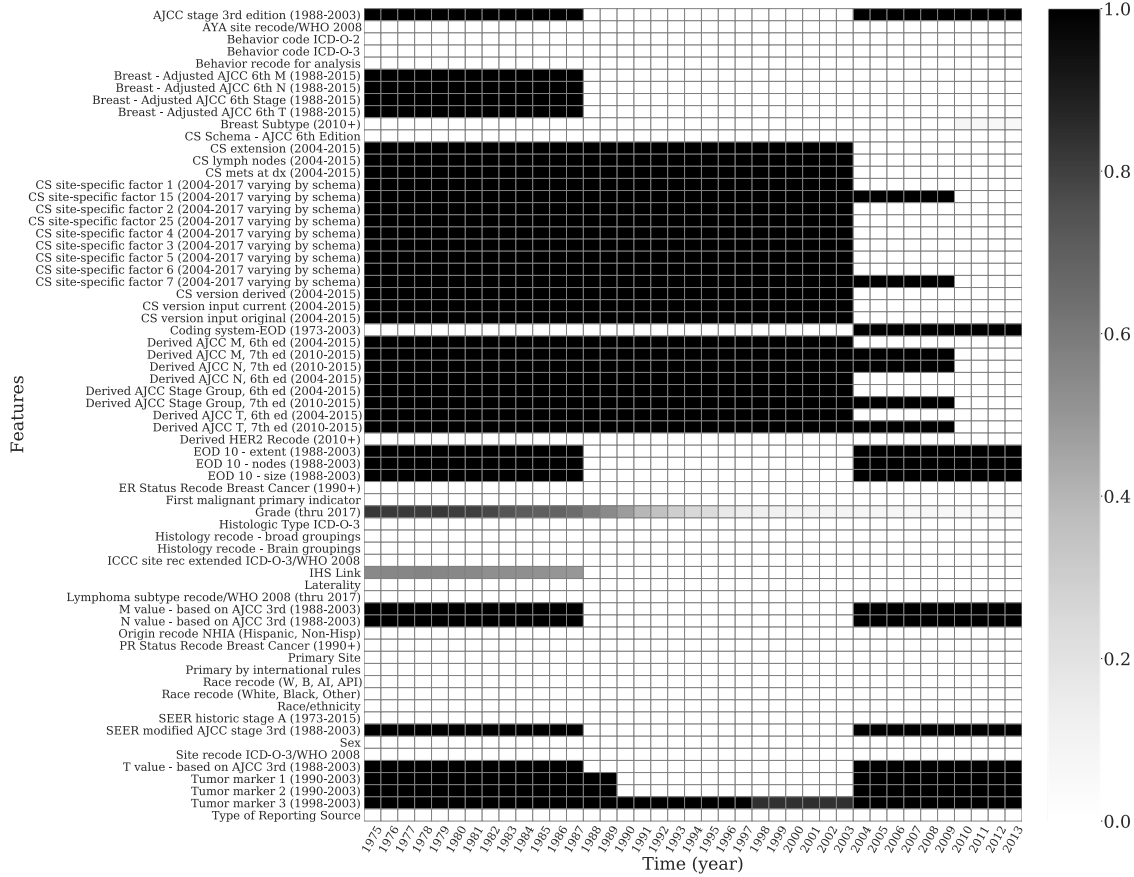

Figure 10: Missingness of categorical features in SEER (Breast).

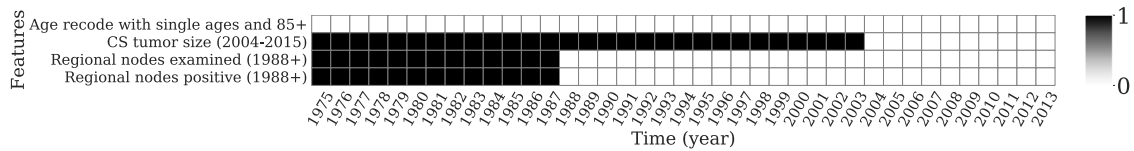

Figure 11: Missingness of numerical features in SEER (Breast).

EVALUATING MODEL PERFORMANCE IN MEDICAL DATASETS OVER TIME

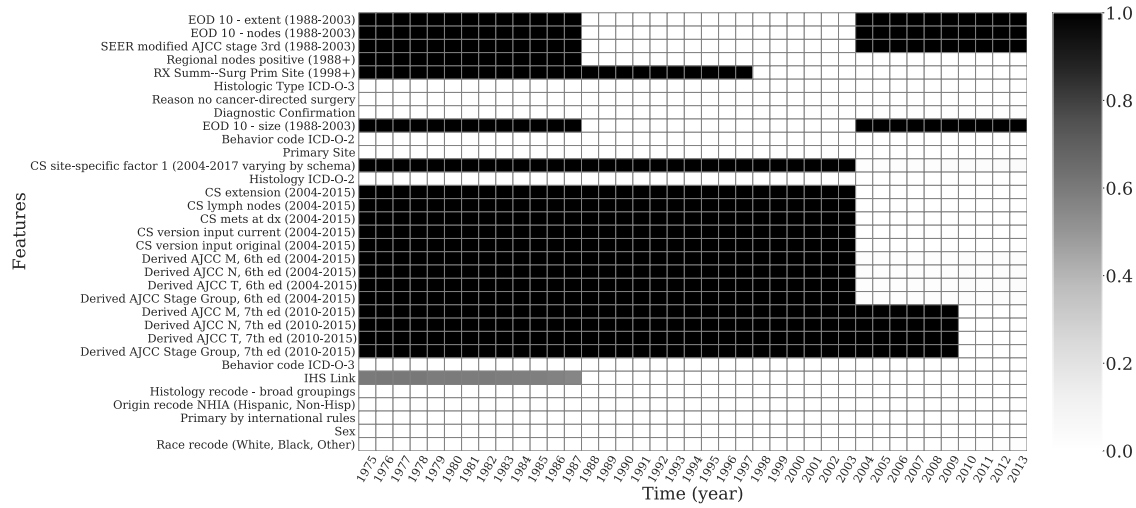

Figure 12: Missingness of categorical features in SEER (Colon).

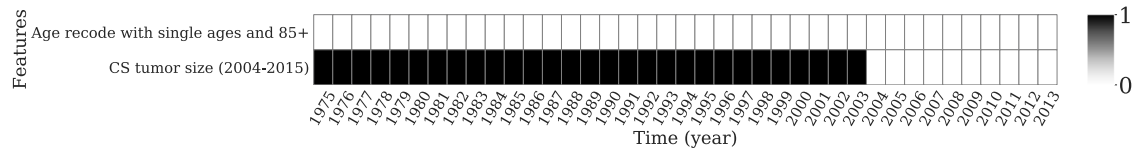

Figure 13: Missingness of numerical features in SEER (Colon).

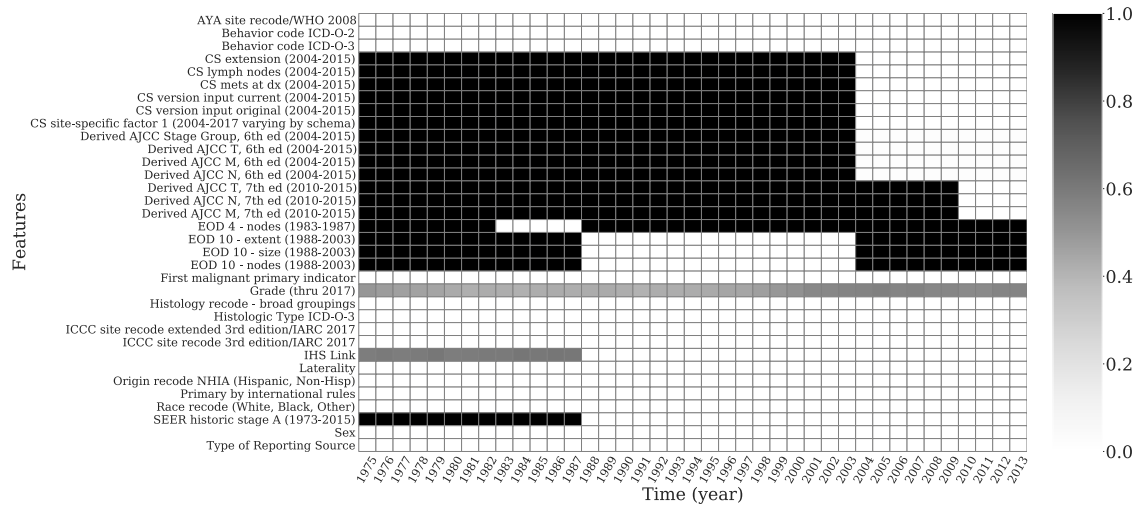

Figure 14: Missingness of categorical features in SEER (Lung).

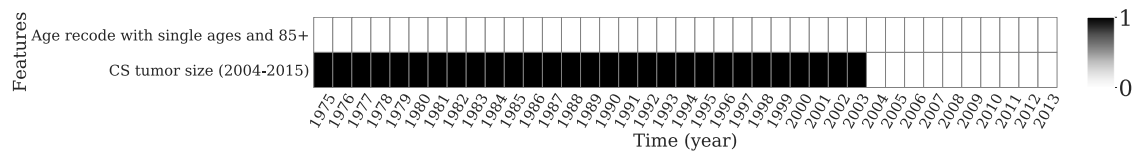

Figure 15: Missingness of numerical features in SEER (Lung).

## Appendix D. Additional CDC COVID-19 Data Details

The COVID-19 Case Surveillance Detailed Data ([Centers for Disease Control and Prevention, 2020](#)) is a national, publicly available dataset provided by the CDC. It contains 33 elements, with patient-level data including symptoms, demographics, and state of residence. The performance over time is evaluated on a *monthly* basis. We use the version the released on June 6th, 2022. Disclaimer: “The CDC does not take responsibility for the scientific validity or accuracy of methodology, results, statistical analyses, or conclusions presented.”

- Data access: To access the data, users must complete a registration information and data use restrictions agreement (RIDURA).
- Cohort selection: The cohort consists of all patients who were lab-confirmed positive for COVID-19, had a non-null positive specimen date, and were hospitalized (`hosp_yn = Yes`). Cohort selection diagrams are given in Figures 16
- Cohort characteristics: Cohort characteristics are given in Table 6.
- Outcome definition: mortality, defined by `death_yn = Yes`
- Features: We list the features used in the CDC COVID-19 datasets in Section D.2. We convert all categorical variables into dummy features, and apply standard scaling to numerical variables (subtract mean and divide by standard deviation).
- Missingness heat map: is given in Figure 17.
- Additionally, we provide stacked area plots showing how the distribution of ages (Figure 18(a) and states 18(b) shifts over time.

D.1. Cohort Selection and Cohort Characteristics

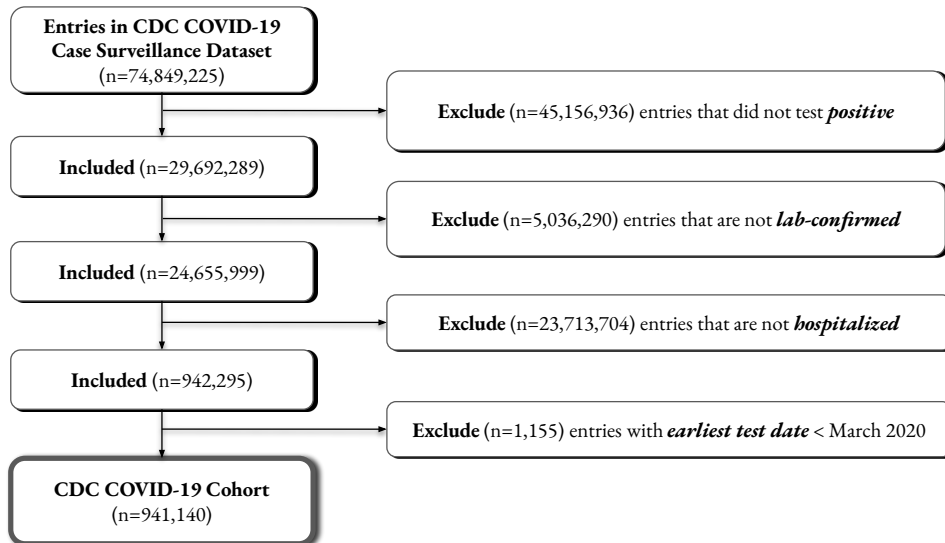

Figure 16: Cohort selection diagram - CDC COVID-19

Table 6: CDC COVID-19 cohort characteristics, with count (%) or median (Q1–Q3).

| Characteristic                |                 | Missingness | Type        |
|-------------------------------|-----------------|-------------|-------------|
| <b>Sex</b>                    |                 |             |             |
| Female                        | 455,376 (48.4%) | –           | categorical |
| Male                          | 475,223 (50.5%) | –           | categorical |
| Unknown/Missing               | 10,541 (1.1%)   | –           | categorical |
| <b>Age Group</b>              |                 |             |             |
| 0 - 9                         | 16,373 (1.7%)   | –           | categorical |
| 10 - 19                       | 17,252 (1.8%)   | –           | categorical |
| 20 - 29                       | 48,505 (5.2%)   | –           | categorical |
| 30 - 39                       | 71,776 (7.6%)   | –           | categorical |
| 40 - 49                       | 88,531 (9.4%)   | –           | categorical |
| 50 - 59                       | 141,805 (15.1%) | –           | categorical |
| 60 - 69                       | 189,354 (20.1%) | –           | categorical |
| 70 - 79                       | 189,018 (20.1%) | –           | categorical |
| 80+                           | 177,765 (18.9%) | –           | categorical |
| Missing                       | 761 (0.1%)      | –           | categorical |
| <b>Race</b>                   |                 |             |             |
| White                         | 544,199 (57.8%) | –           | categorical |
| Black                         | 173,847 (18.5%) | –           | categorical |
| Other                         | 205,547 (21.8%) | –           | categorical |
| <b>State of Residence</b>     |                 |             |             |
| NY                            | 189,684 (20.2%) | –           | categorical |
| OH                            | 70,097 (7.4%)   | –           | categorical |
| FL                            | 35,679 (3.8%)   | –           | categorical |
| WA                            | 58,854 (6.3%)   | –           | categorical |
| MA                            | 31,441 (3.3%)   | –           | categorical |
| Other                         | 555,353 (59.0%) | –           | categorical |
| <b>Mechanical Ventilation</b> |                 |             |             |
| Yes                           | 38,009 (4.0%)   | –           | categorical |
| No                            | 138,331 (14.7%) | –           | categorical |
| Unknown/Missing               | 764,800 (81.2%) | –           | categorical |
| <b>Mortality</b>              |                 |             |             |
| 1                             | 190,786 (20.3%) | –           | categorical |
| 0                             | 750,354 (79.7%) | –           | categorical |

### D.2. Features

abdom\_yn, abxchest\_yn, acuterespdistress\_yn, age\_group, chills\_yn, cough\_yn, diarrhea\_yn, ethnicity, fever\_yn, hc\_work\_yn, headache\_yn, hosp\_yn, icu\_yn, mechvent\_yn, medcond\_yn, month, myalgia\_yn, nauseavomit\_yn, pna\_yn, race, relative\_month, res\_county, res\_state, runnose\_yn, sex, sfever\_yn, sob\_yn, sthroat\_yn,

### D.3. Missingness heatmaps

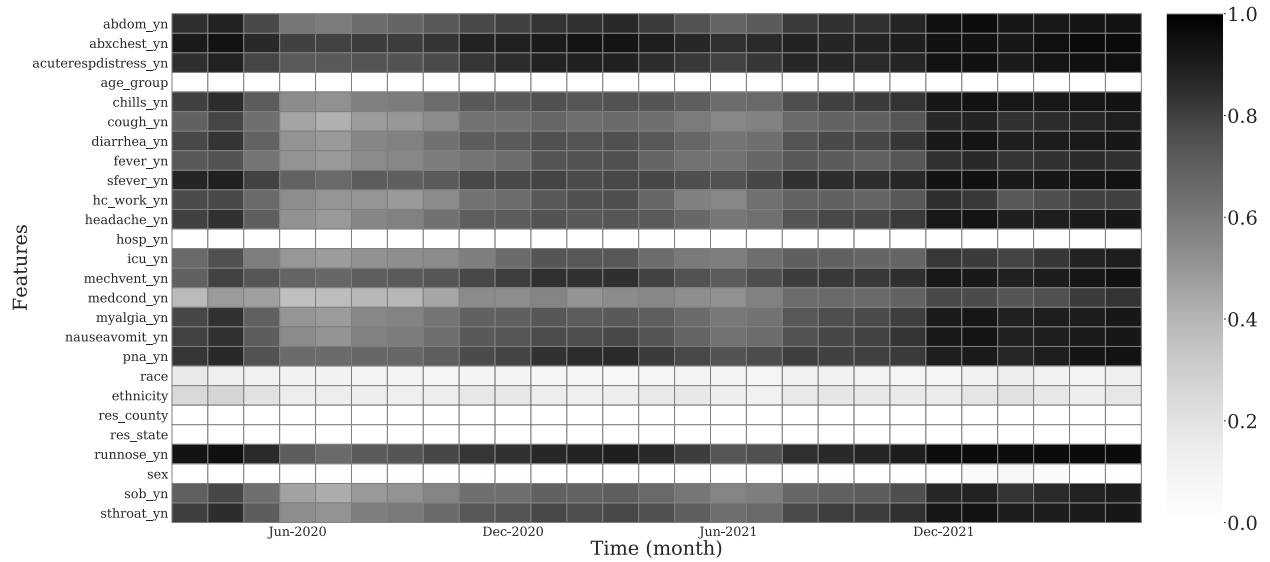

Figure 17: Missingness over time for features in CDC COVID-19 dataset after cohort selection. The darker the color, the larger the proportion of missing data.

### D.4. Additional Figures

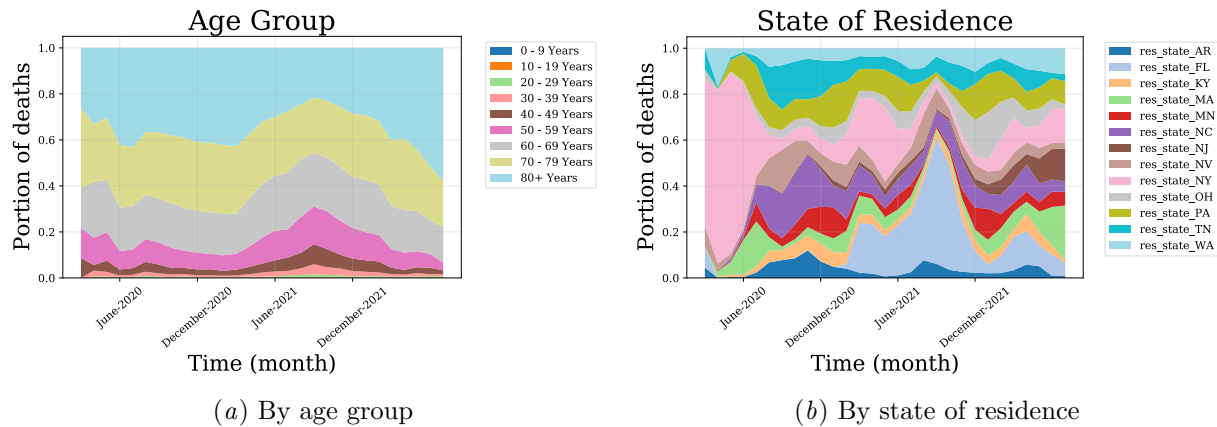

Figure 18: Proportion of deaths over time for each age group and state of residence.

## Appendix E. Additional SWPA COVID-19 Data Details

The Southwestern Pennsylvania (SWPA) COVID-19 dataset consists of EHR data from patients tested for COVID-19. It was collected by a major healthcare provider in SWPA, and includes patient demographics, labs, problem histories, medications, inpatient vs. outpatient status, and other information collected in the patient encounter. The performance over time is evaluated on a *monthly* basis.

- Data access: This is a private dataset.
- Cohort selection: The cohort consists of COVID-19 patients who tested positive for COVID-19 and were not already in the ICU or mechanically ventilated. We filter for the first positive test, and define features and outcomes relative to that time. Cohort selection diagrams are given in Figures 19. If there are multiple samples per patient, we filter to the first entry per patient, which corresponds to when a patient first enters the dataset. This corresponds to a particular interpretation of the prediction: when a patient is first tests positive, given what we know about that patient, what is their estimated risk of 90-day mortality?
- Cohort characteristics: Cohort characteristics are given in Table 7.
- Outcome definition: 90-day mortality by comparing the death date and test date
- Features: We list the features used in the SWPA COVID-19 datasets in Section E.2. We convert all categorical variables into dummy features, and apply standard scaling to numerical variables (subtract mean and divide by standard deviation). To create a fixed length feature vector, where applicable we take the most recent value of each feature (e.g. most recent lab values).
- Missingness heat maps: are given in Figures 20, 21, 22, and 23,

## E.1. Cohort Selection and Cohort Characteristics

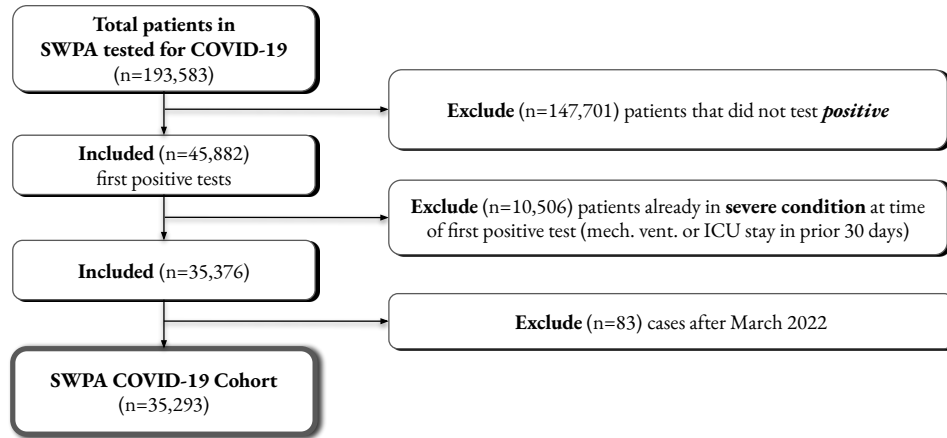

Figure 19: Cohort selection diagram - SWPA COVID-19

Table 7: SWPA COVID-19 cohort characteristics, with count (%) or median (Q1–Q3).

| Characteristic          |                | Missingness | Type        |
|-------------------------|----------------|-------------|-------------|
| <b>Gender</b>           |                |             |             |
| Female                  | 20,283 (57.5%) | –           | categorical |
| Male                    | 15,003 (42.5%) | –           | categorical |
| Unknown                 | 7 (0.0%)       | –           | categorical |
| <b>Age</b>              |                |             |             |
| Under 20                | 3,210 (9.1%)   | –           | categorical |
| 20 – 30                 | 4,349 (12.3%)  | –           | categorical |
| 30 – 40                 | 4,667 (13.2%)  | –           | categorical |
| 40 – 50                 | 4,653 (13.2%)  | –           | categorical |
| 50 – 60                 | 6,111 (17.3%)  | –           | categorical |
| 60 – 70                 | 5,700 (16.2%)  | –           | categorical |
| 70+                     | 6,603 (18.7%)  | –           | categorical |
| <b>Location of test</b> |                |             |             |
| Inpatient               | 14,911 (42.2%) | –           | categorical |
| Outpatient              | 17,661 (50.0%) | –           | categorical |
| Unknown                 | 2,721 (7.7%)   | –           | categorical |
| <b>90-day mortality</b> |                |             |             |
| True                    | 1,516 (4.3%)   | –           | categorical |
| False                   | 33,777 (95.7%) | –           | categorical |



## E.2. Features

Asthma  
 CAD  
 CHF  
 CKD  
 COPD  
 CRP  
 CVtest\_ICD\_Acute pharyngitis, unspecified  
 CVtest\_ICD\_Acute upper respiratory infection, unspecified  
 CVtest\_ICD\_Anosmia  
 CVtest\_ICD\_Contact with and (suspected) exposure to other viral communicable diseases  
 CVtest\_ICD\_Encounter for general adult medical examination without abnormal findings  
 CVtest\_ICD\_Encounter for screening for other viral diseases  
 CVtest\_ICD\_Encounter for screening for respiratory disorder NEC  
 CVtest\_ICD\_Nasal congestion  
 CVtest\_ICD\_Other general symptoms and signs  
 CVtest\_ICD\_Other specified symptoms and signs involving the circulatory and respiratory systems  
 CVtest\_ICD\_Pain, unspecified  
 CVtest\_ICD\_Parageusia  
 CVtest\_ICD\_R05.9  
 CVtest\_ICD\_R51.9  
 CVtest\_ICD\_U07.1  
 CVtest\_ICD\_Viral infection, unspecified  
 CVtest\_ICD\_Z20.822  
 ESKD  
 Hypertension  
 IP\_ICD\_z20.828  
 Immunocompromised  
 Interstitial Lung disease  
 OP\_ICD\_Abdominal Pain  
 OP\_ICD\_Chest Pain  
 OP\_ICD\_Chills  
 OP\_ICD\_Coronavirus Concerns  
 OP\_ICD\_Covid Infection  
 OP\_ICD\_Exposure To Covid-19  
 OP\_ICD\_Generalized Body Aches  
 OP\_ICD\_Headache  
 OP\_ICD\_Labs Only  
 OP\_ICD\_Medication Refill  
 OP\_ICD\_Nasal Congestion  
 OP\_ICD\_Nausea  
 OP\_ICD\_Other  
 OP\_ICD\_Results  
 OP\_ICD\_Shortness of Breath  
 OP\_ICD\_Sore Throat  
 OP\_ICD\_URI  
 age\_bin\_(20, 30]  
 age\_bin\_(30, 40]  
 age\_bin\_(40, 50]  
 age\_bin\_(50, 60]  
 age\_bin\_(60, 70]  
 age\_bin\_(70, 200]  
 bmi  
 cancer  
 cough  
 covid\_vaccination\_given  
 diabetes  
 fatigue  
 fever  
 gender  
 hyperglycemia  
 lab\_ANION GAP  
 lab\_ATRIAL RATE  
 lab\_BASOPHILS ABSOLUTE COUNT  
 lab\_BASOPHILS RELATIVE PERCENT  
 lab\_BLOOD UREA NITROGEN  
 lab\_CALCIIUM  
 lab\_CALCULATED T AXIS  
 lab\_CALCULATED R AXIS  
 lab\_CHLORIDE  
 lab\_CO2  
 lab\_CREATININE  
 lab\_EDSINOPHILS ABSOLUTE COUNT  
 lab\_EDSINOPHILS RELATIVE PERCENT  
 lab\_GFR MDRD AF AMER  
 lab\_GFR MDRD NON AF AMER  
 lab\_GLUCCOSE  
 lab\_IMMATURE GRANULOCYTES RELATIVE PERCENT  
 lab\_LYMPHOCYTES ABSOLUTE COUNT  
 lab\_LYMPHOCYTES RELATIVE PERCENT  
 lab\_MEAN CORPUSCULAR HEMOGLOBIN  
 lab\_MEAN CORPUSCULAR HEMOGLOBIN CONC  
 lab\_MEAN PLATELET VOLUME  
 lab\_MONOCYTES ABSOLUTE COUNT  
 lab\_MONOCYTES RELATIVE PERCENT  
 lab\_NEUTROPHILS RELATIVE PERCENT  
 lab\_NUCLEATED RED BLOOD CELLS  
 lab\_POTASSIUM  
 lab\_PROTEIN TOTAL  
 lab\_Q-T INTERVAL  
 lab\_QRS DURATION  
 lab\_QTC CALCULATION  
 lab\_RED CELL DISTRIBUTION WIDTH  
 lab\_SODIUM  
 lab\_VENTRICULAR RATE  
 lab\_merged\_CRP  
 lab\_merged\_albumin  
 lab\_merged\_alkalinePhosphatase  
 lab\_merged\_alt  
 lab\_merged\_ast  
 lab\_merged\_bnp  
 lab\_merged\_ddimer  
 lab\_merged\_directBilirubin  
 lab\_merged\_ggt  
 lab\_merged\_hct  
 lab\_merged\_hgb  
 lab\_merged\_indirectBilirubin  
 lab\_merged\_lactate  
 lab\_merged\_ldh  
 lab\_merged\_mcv  
 lab\_merged\_neutrophil  
 lab\_merged\_platelets  
 lab\_merged\_pt  
 lab\_merged\_rbc  
 lab\_merged\_sao2  
 lab\_merged\_totalBilirubin  
 lab\_merged\_totalProtein  
 lab\_merged\_troponin  
 lab\_merged\_ufc  
 labs\_ICD\_Acute pharyngitis, unspecified  
 labs\_ICD\_Acute upper respiratory infection, unspecified  
 labs\_ICD\_Chest pain, unspecified  
 labs\_ICD\_Contact with and (suspected) exposure to other viral communicable diseases  
 labs\_ICD\_Dyspnea, unspecified  
 labs\_ICD\_Encounter for other preprocedural examination  
 labs\_ICD\_Essential (primary) hypertension  
 labs\_ICD\_Fever, unspecified  
 labs\_ICD\_Heart failure, unspecified  
 labs\_ICD\_Other general symptoms and signs  
 labs\_ICD\_Other pulmonary embolism without acute cor pulmonale  
 labs\_ICD\_Other specified abnormalities of plasma proteins  
 labs\_ICD\_R05.9  
 labs\_ICD\_Shortness of breath  
 labs\_ICD\_Syncope and collapse  
 labs\_ICD\_U07.1  
 labs\_ICD\_Unspecified atrial fibrillation  
 labs\_ICD\_Viral infection, unspecified  
 labs\_ICD\_Z20.822  
 liver disease  
 location\_covidtest\_ordered\_Inpatient  
 location\_covidtest\_ordered\_Outpatient  
 lung disease  
 med\_dx\_Acquired hypothyroidism  
 med\_dx\_Anxiety  
 med\_dx\_COVID-19  
 med\_dx\_Encounter for antineoplastic chemotherapy  
 med\_dx\_Encounter for antineoplastic chemotherapy and immunotherapy  
 med\_dx\_Encounter for antineoplastic immunotherapy  
 med\_dx\_Encounter for immunization  
 med\_dx\_Gastroesophageal reflux disease without esophagitis  
 med\_dx\_Gastroesophageal reflux disease, esophagitis presence not specified  
 med\_dx\_Generalized anxiety disorder  
 med\_dx\_Hyperlipidemia, unspecified hyperlipidemia type  
 med\_dx\_Hypomagnesemia  
 med\_dx\_Hypothyroidism, unspecified type  
 med\_dx\_Iron deficiency anemia, unspecified iron deficiency anemia type  
 med\_dx\_Mixed hyperlipidemia  
 med\_dx\_Primary osteoarthritis of right knee  
 medication\_ACETAMINOPHEN 325 MG TABLET  
 medication\_ALBUTEROL SULFATE 2.5 MG/3 ML (0.083 %) SOLUTION FOR NEBULIZATION  
 medication\_ALBUTEROL SULFATE HFA 90 MCG/ACTUATION AEROSOL INHALER  
 medication\_ASPIRIN 81 MG TABLET,DELAYED RELEASE  
 medication\_DEXAMETHASONE SODIUM PHOSPHATE 4 MG/ML INJECTION SOLUTION  
 medication\_DIPHENHYDRAMINE 50 MG/ML INJECTION (WRAPPER)  
 medication\_EPINEPHRINE 0.3 MG/0.3 ML INJECTION, AUTO-INJECTOR  
 medication\_FENTANYL (PF) 50 MCG/ML INJECTION SOLUTION  
 medication\_HYDROCODONE 5 MG-ACETAMINOPHEN 325 MG TABLET  
 medication\_HYDROCORTISONE SOD SUCCINATE (PF) 100 MG/2 ML SOLUTION FOR INJECTION  
 medication\_IOPAMIDOL 76 % INTRAVENOUS SOLUTION  
 medication\_LACTATED RINGERS INTRAVENOUS SOLUTION  
 medication\_MIDAZOLAM 1 MG/ML INJECTION SOLUTION  
 medication\_MALOXONE 0.4 MG/ML INJECTION SOLUTION  
 medication\_ONDANSETRON HCL (PF) 4 MG/2 ML INJECTION SOLUTION  
 medication\_OXYCODONE 5 MG TABLET  
 medication\_PANTOPRAZOLE 40 MG TABLET,DELAYED RELEASE  
 medication\_PROPOFOL 10 MG/ML INTRAVENOUS BOLUS (20 ML)  
 medication\_SODIUM CHLORIDE 0.9 % INTRAVENOUS SOLUTION  
 medication\_SODIUM CHLORIDE 0.9 % IV BOLUS  
 myalgia  
 obesity  
 past7Dprobhx\_ICD\_Acute kidney failure, unspecified  
 past7Dprobhx\_ICD\_Anemia, unspecified  
 past7Dprobhx\_ICD\_Anxiety disorder, unspecified  
 past7Dprobhx\_ICD\_Chest pain, unspecified  
 past7Dprobhx\_ICD\_Dizziness and giddiness  
 past7Dprobhx\_ICD\_Encounter for general adult medical examination without abnormal findings  
 past7Dprobhx\_ICD\_Encounter for immunization  
 past7Dprobhx\_ICD\_Encounter for screening for malignant neoplasm of colon  
 past7Dprobhx\_ICD\_F32.A  
 past7Dprobhx\_ICD\_Gastro-esophageal reflux disease without esophagitis

## EVALUATING MODEL PERFORMANCE IN MEDICAL DATASETS OVER TIME

past7Dprobhx\_ICD\_Hyperlipidemia, unspecified  
past7Dprobhx\_ICD\_Hypokalemia  
past7Dprobhx\_ICD\_Hypothyroidism, unspecified  
past7Dprobhx\_ICD\_Mixed hyperlipidemia  
past7Dprobhx\_ICD\_Obstructive sleep apnea (adult) (pediatric)  
past7Dprobhx\_ICD\_Syncope and collapse  
past7Dprobhx\_ICD\_Type 2 diabetes mellitus without complications  
past7Dprobhx\_ICD\_Unspecified atrial fibrillation  
probhx\_ICD\_Acute kidney failure, unspecified  
probhx\_ICD\_Anemia, unspecified  
probhx\_ICD\_Anxiety disorder, unspecified  
probhx\_ICD\_Chest pain, unspecified  
probhx\_ICD\_Dizziness and giddiness  
probhx\_ICD\_Encounter for general adult medical examination without  
abnormal findings  
probhx\_ICD\_Encounter for immunization  
probhx\_ICD\_Encounter for screening for malignant neoplasm of colon  
probhx\_ICD\_F32.A  
probhx\_ICD\_Gastro-esophageal reflux disease without esophagitis  
probhx\_ICD\_Hyperlipidemia, unspecified  
probhx\_ICD\_Hypokalemia  
probhx\_ICD\_Hypothyroidism, unspecified  
probhx\_ICD\_Mixed hyperlipidemia  
probhx\_ICD\_Obstructive sleep apnea (adult) (pediatric)  
probhx\_ICD\_Syncope and collapse  
probhx\_ICD\_Type 2 diabetes mellitus without complications  
probhx\_ICD\_Unspecified atrial fibrillation  
transplant  
troponin  
vaccine\_COVID-19\_RS-AD26 (PF) Vaccine (Janssen)  
vaccine\_COVID-19 Vaccine, Unspecified  
vaccine\_COVID-19 mRNA (PF) Vaccine (Moderna)  
vaccine\_COVID-19 mRNA (PF) Vaccine (Pfizer)  
vaccine\_Flu Whole  
vaccine\_INFLUENZA, CCIV4  
vaccine\_Influenza  
vaccine\_Influenza High PF  
vaccine\_Influenza ID PF  
vaccine\_Influenza PF  
vaccine\_Influenza Vaccine, Quadrivalent, Adjuvanted  
vaccine\_Influenza, High-dose, Quadrivalent  
vaccine\_Influenza, Quadrivalent  
vaccine\_Influenza, Recombinant (RIV4)  
vaccine\_Influenza, Recombinant (Riv3)  
vaccine\_Influenza, Trivalent, Adjuvanted  
vaccine\_LAIV3  
vaccine\_Pneumococcal  
vaccine\_Pneumococcal Conjugate 13-valent  
vaccine\_Pneumococcal Polysaccharide  
vaccine\_TIVA

### E.3. Missingness heatmaps

This section plots missingness heatmaps of categorical and numerical features over time. Darker color means larger proportion of missing data.

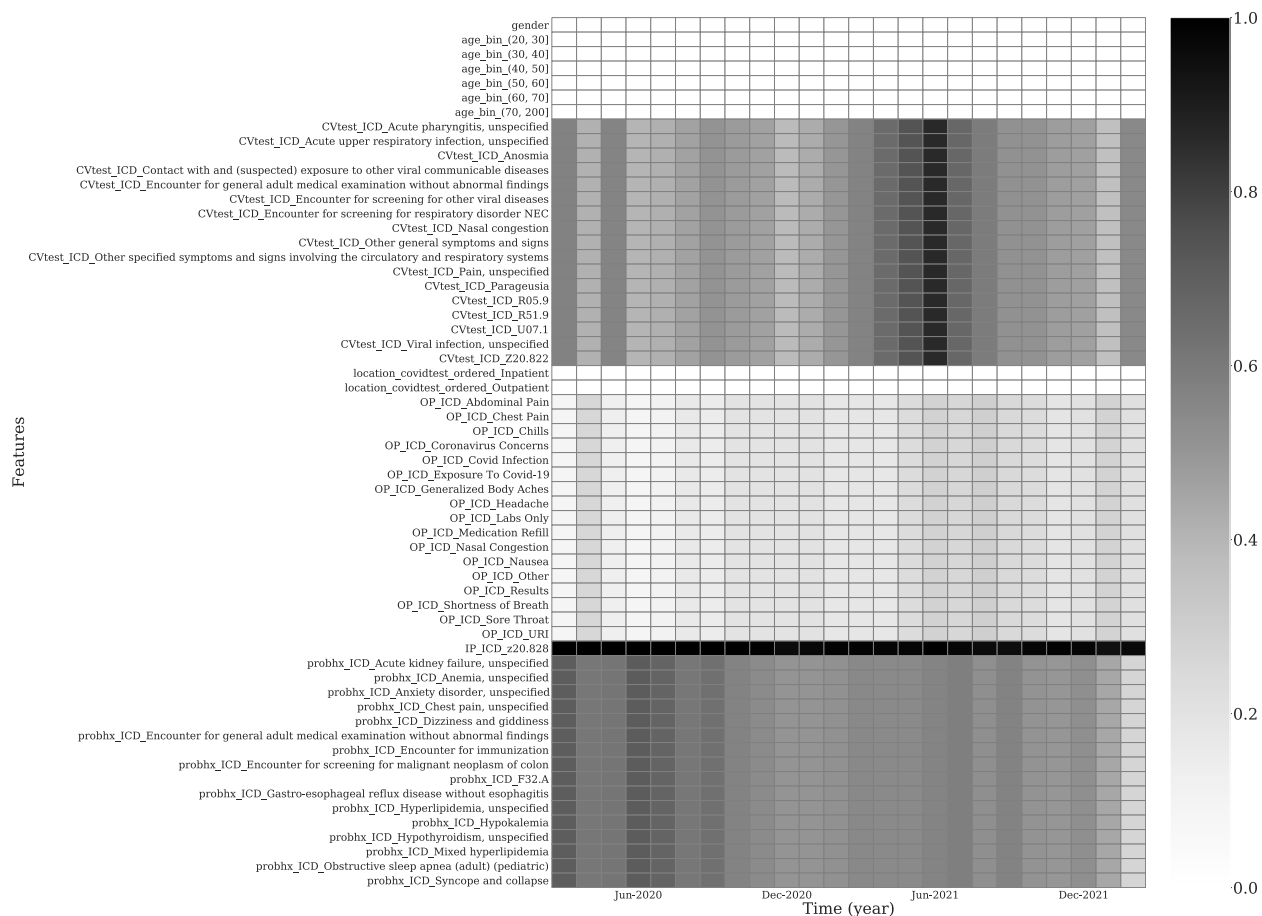

Figure 20: Missingness of categorical features in SWPA COVID-19 dataset (part 1).

EVALUATING MODEL PERFORMANCE IN MEDICAL DATASETS OVER TIME

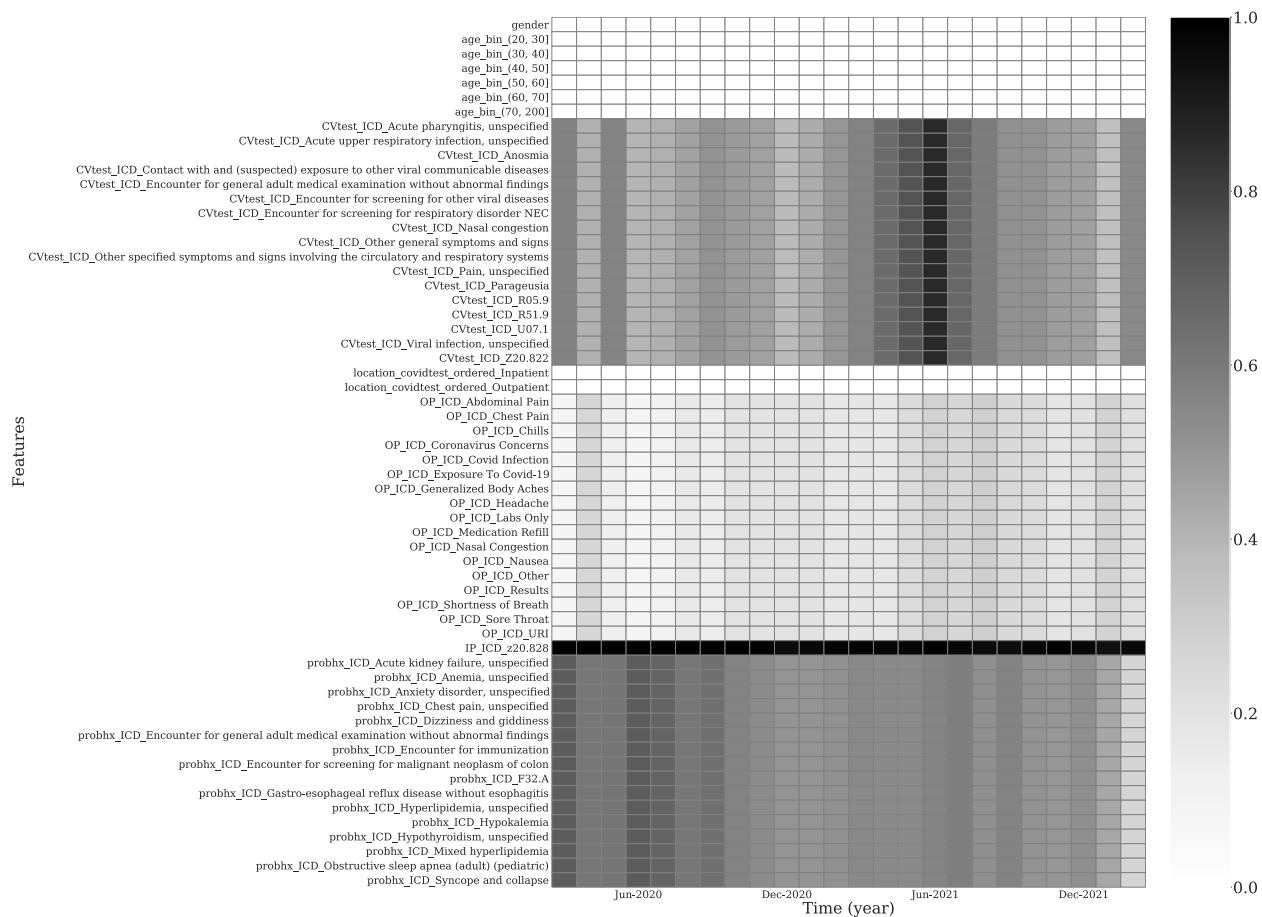

Figure 21: Missingness of categorical features in SWPA COVID-19 dataset (part 2).

EVALUATING MODEL PERFORMANCE IN MEDICAL DATASETS OVER TIME



Figure 22: Missingness of categorical features in SWPA COVID-19 dataset (part 3).

EVALUATING MODEL PERFORMANCE IN MEDICAL DATASETS OVER TIME

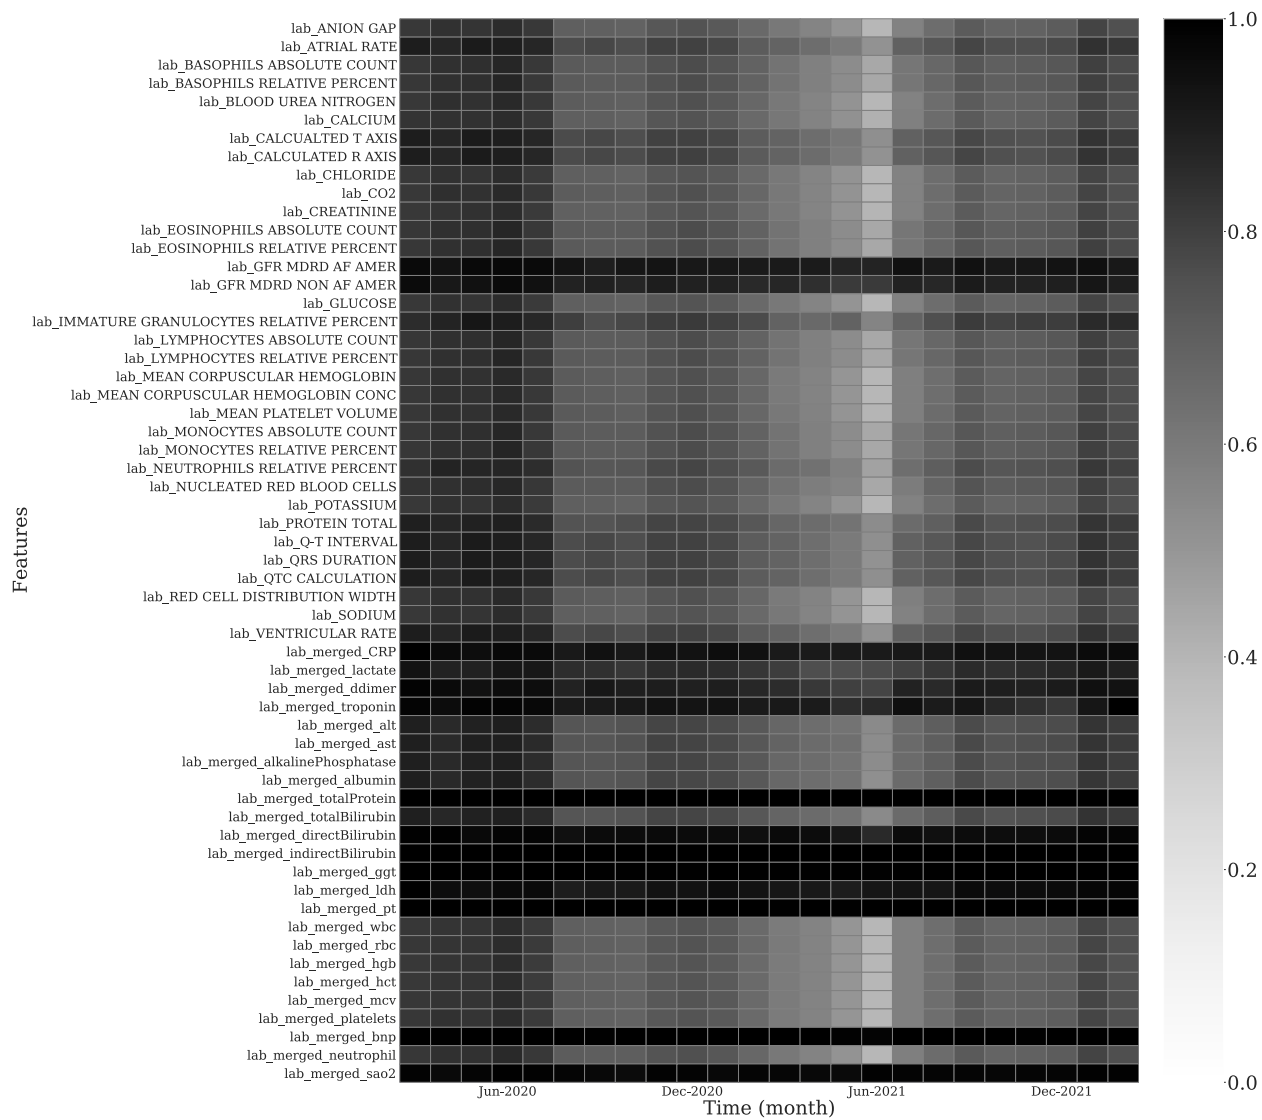

Figure 23: Missingness of numerical features in SWPA COVID-19.

## Appendix F. Additional MIMIC-IV Data Details

The Medical Information Mart for Intensive Care (MIMIC)-IV (Johnson et al., 2021) database contains EHR data from patients admitted to critical care units from 2008–2019. MIMIC-IV is an update to MIMIC-III, adding time annotations placing each sample into a three-year time range, and removing elements from the old CareVue EHR system (before 2008). Each patient has an `anchor_year_group`, `anchor_year` and `intime`. For each patient, we first calculated an offset as the difference between `intime` and `anchor_year`. Then, we approximated the admit time as the midpoint of `anchor_year_group` after applying the computed offset.

The performance over time is evaluated on a *yearly* basis. Our study uses MIMIC-IV-1.0.

- Data access: Users must create a Physionet account, become credentialed, and sign a data use agreement (DUA).
- Cohort selection: We select all patients in the `icustays` table, filtering for their first encounter (minimum `intime`), and defining a feature vector only using information available by the first 24 hrs of their first encounter. (Selection diagram in Figure 24). If there are multiple samples per patient, we filter to the first entry per patient, which corresponds to when a patient first enters the dataset. This corresponds to a particular interpretation of the prediction: when a patient first visits the ICU, given what we know about that patient, what is their estimated risk of in-ICU mortality?
- Outcome definition: The outcome of interest is in-ICU mortality, defined by comparing the `outtime` of the patient’s ICU visit with the patient’s `dod` (date of death, in the `patients` table). As noted in the documentation, out-of-hospital mortality is not recorded.
- Cohort characteristics: Cohort characteristics are given in Table 8.
- Features: We list the features used in the MIMIC-IV datasets in Section F.2. We convert all categorical variables into dummy features, and apply standard scaling to numerical variables (subtract mean and divide by standard deviation). To create a fixed length feature vector, we take the most recent value of any patient history data available (e.g. most recent lab values).
- Missingness heat maps: are given in Figures 25, 26, 27, 28.

F.1. Cohort Selection and Cohort Characteristics

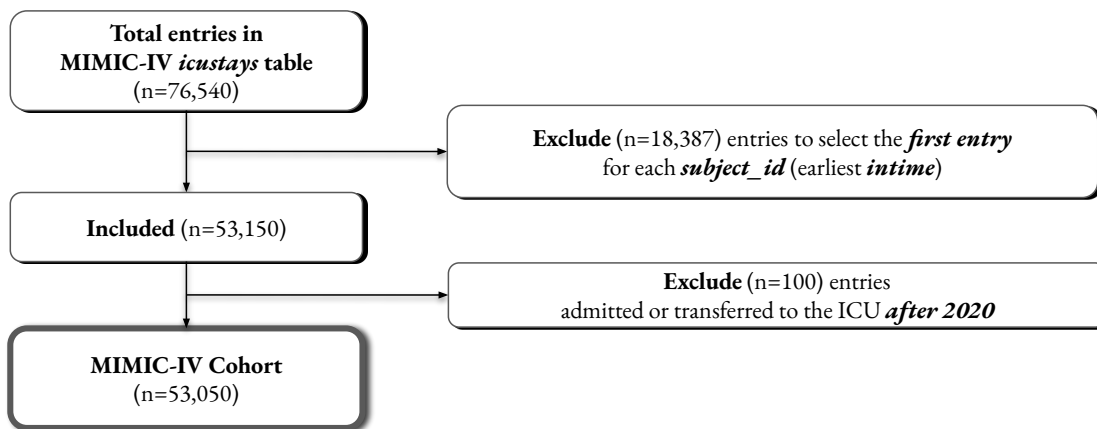

Figure 24: Cohort selection diagram - MIMIC-IV



Table 8: MIMIC-IV cohort characteristics, with count (%) or median (Q1-Q3).

| Characteristic                                  |                | Missingness | Type        |
|-------------------------------------------------|----------------|-------------|-------------|
| <b>Gender</b>                                   |                |             |             |
| Female                                          | 23,313 (43.9%) | –           | categorical |
| Male                                            | 29,737 (56.1%) | –           | categorical |
| <b>Age at Admission</b>                         | 66 (54-78)     | 0.0%        | continuous  |
| <b>O2 Delivery Device(s)</b>                    |                |             |             |
| Use device                                      | 33,359 (62.9%) | –           | categorical |
| None                                            | 18,549 (35.0%) | –           | categorical |
| Missing                                         | 1,142 (2.2%)   | –           | categorical |
| <b>Pupil Response R</b>                         |                |             |             |
| Brisk                                           | 39,708 (74.9%) | –           | categorical |
| Sluggish                                        | 4,603 (8.7%)   | –           | categorical |
| Non-reactive                                    | 1,812 (3.4%)   | –           | categorical |
| Missing                                         | 6,927 (13.1%)  | –           | categorical |
| <b>first_careunit</b>                           |                |             |             |
| Medical Intensive Care Unit (MICU)              | 10,213 (19.3%) | –           | categorical |
| Surgical Intensive Care Unit (SICU)             | 8,241 (15.5%)  | –           | categorical |
| Medical/Surgical Intensive Care Unit (MICU/S... | 8,808 (16.6%)  | –           | categorical |
| Cardiac Vascular Intensive Care Unit (CVICU)    | 9,437 (17.8%)  | –           | categorical |
| Coronary Care Unit (CCU)                        | 6,098 (11.5%)  | –           | categorical |
| Trauma SICU (TSICU)                             | 6,947 (13.1%)  | –           | categorical |
| Other                                           | 3,306 (6.2%)   | –           | categorical |
| <b>Anion Gap</b>                                | 13 (11-16)     | 0.5%        | continuous  |
| <b>Heart Rhythm</b>                             |                |             |             |
| SR (Sinus Rhythm)                               | 34,004 (64.1%) | –           | categorical |
| Abnormal heart rhythm                           | 18,657 (35.2%) | –           | categorical |
| Missing                                         | 389 (0.7%)     | –           | categorical |
| <b>Glucose FS (range 70 -100)</b>               | 131 (110-164)  | 32.7%       | continuous  |
| <b>Eye Opening</b>                              |                |             |             |
| Spontaneously                                   | 39,216 (73.9%) | –           | categorical |
| To Speech                                       | 7,387 (13.9%)  | –           | categorical |
| None                                            | 4,538 (8.6%)   | –           | categorical |
| To Pain                                         | 1,702 (3.2%)   | –           | categorical |
| Missing                                         | 207 (0.4%)     | –           | categorical |
| <b>Lactate</b>                                  | 2 (1-2)        | 22.0%       | continuous  |
| <b>Motor Response</b>                           |                |             |             |
| Obeys Commands                                  | 44,409 (83.7%) | –           | categorical |
| Localizes Pain                                  | 3,419 (6.4%)   | –           | categorical |
| Flex-withdraws                                  | 1,673 (3.2%)   | –           | categorical |
| No response                                     | 2,930 (5.5%)   | –           | categorical |
| Abnormal extension                              | 157 (0.3%)     | –           | categorical |
| Abnormal Flexion                                | 238 (0.4%)     | –           | categorical |
| Missing                                         | 224 (0.4%)     | –           | categorical |
| <b>Respiratory Pattern</b>                      |                |             |             |
| Regular                                         | 29,373 (55.4%) | –           | categorical |
| Not regular                                     | 1,739 (3.3%)   | –           | categorical |
| Missing                                         | 21,938 (41.4%) | –           | categorical |
| <b>Richmond-RAS Scale</b>                       | 0 (-1-0)       | 15.4%       | categorical |
| <b>in-icu mortality</b>                         |                |             |             |
| 0                                               | 49,716 (93.7%) | –           | categorical |
| 1                                               | 3,334 (6.3%)   | –           | categorical |

**F.2. Features**

|                                     |                                            |
|-------------------------------------|--------------------------------------------|
| 18 Gauge Dressing Occlusive         | Diet Type                                  |
| 18 Gauge placed in outside facility | Difficulty swallowing                      |
| 20 Gauge Dressing Occlusive         | Dorsal PedPulse L                          |
| 20 Gauge placed in outside facility | Dorsal PedPulse R                          |
| 20 Gauge placed in the field        | ETOH                                       |
| Abdominal Assessment                | Ectopy Type 1                              |
| Activity                            | Edema Amount                               |
| Activity Tolerance                  | Edema Location                             |
| Admission Weight (Kg)               | Education Barrier                          |
| Admission Weight (lbs.)             | Education Existing Knowledge               |
| Alanine Aminotransferase (ALT)      | Education Learner                          |
| Alarms On                           | Education Method                           |
| Albumin                             | Education Readiness/Motivation             |
| Alkaline Phosphatase                | Education Response                         |
| All Medications Tolerated           | Education Topic                            |
| Ambulatory aid                      | Eosinophils                                |
| Anion Gap                           | Epithelial Cells                           |
| Anion gap                           | Eye Opening                                |
| Anti Embolic Device                 | Family Communication                       |
| Anti Embolic Device Status          | Flatus                                     |
| Asparate Aminotransferase (AST)     | GU Catheter Size                           |
| Assistance                          | Gait/Transferring                          |
| BUN                                 | Glucose (serum)                            |
| Balance                             | Glucose FS (range 70 -100)                 |
| Base Excess                         | Goal Richmond-RAS Scale                    |
| Basophils                           | HCO3 (serum)                               |
| Bath                                | HOB                                        |
| Bicarbonate                         | HR                                         |
| Bilirubin, Total                    | HR Alarm - High                            |
| Bowel Sounds                        | HR Alarm - Low                             |
| Braden Activity                     | Heart Rhythm                               |
| Braden Friction/Shear               | Height                                     |
| Braden Mobility                     | Height (cm)                                |
| Braden Moisture                     | Hematocrit                                 |
| Braden Nutrition                    | Hematocrit (serum)                         |
| Braden Sensory Perception           | Hemoglobin                                 |
| CAM-ICU MS Change                   | History of falling (within 3 mnths)*       |
| Calcium non-ionized                 | History of slips / falls                   |
| Calcium, Total                      | Home TF                                    |
| Calculated Total CO2                | INR                                        |
| Capillary Refill L                  | INR(PT)                                    |
| Capillary Refill R                  | IV/Saline lock                             |
| Chloride                            | Insulin pump                               |
| Chloride (serum)                    | Intravenous / IV access prior to admission |
| Commands                            | Judgement                                  |
| Commands Response                   | LLE Color                                  |
| Cough Effort                        | LLE Temp                                   |
| Cough Type                          | LLL Lung Sounds                            |
| Creatinine                          | LUE Color                                  |
| Creatinine (serum)                  | LUE Temp                                   |
| Currently experiencing pain         | LUL Lung Sounds                            |
| Daily Wake Up                       | Lactate                                    |
| Delirium assessment                 | Lactic Acid                                |
| Dialysis patient                    | Living situation                           |
|                                     | Lymphocytes                                |

|                          |                          |
|--------------------------|--------------------------|
| MCH                      | RUL Lung Sounds          |
| MCHC                     | Radial Pulse L           |
| MCV                      | Radial Pulse R           |
| Magnesium                | Red Blood Cells          |
| Mental status            | Resp Alarm - High        |
| Monocytes                | Resp Alarm - Low         |
| Motor Response           | Respiratory Effort       |
| NBP Alarm - High         | Respiratory Pattern      |
| NBP Alarm - Low          | Richmond-RAS Scale       |
| NBP Alarm Source         | ST Segment Monitoring On |
| NBPd                     | Safety Measures          |
| NBPm                     | Secondary diagnosis      |
| NBPs                     | Self ADL                 |
| Nares L                  | Side Rails               |
| Nares R                  | Skin Color               |
| Neutrophils              | Skin Condition           |
| O2 Delivery Device(s)    | Skin Integrity           |
| Oral Care                | Skin Temp                |
| Oral Cavity              | Sodium                   |
| Orientation              | Sodium (serum)           |
| PT                       | SpO2                     |
| PTT                      | SpO2 Alarm - High        |
| Pain Assessment Method   | SpO2 Alarm - Low         |
| Pain Cause               | SpO2 Desat Limit         |
| Pain Level               | Specific Gravity         |
| Pain Level Acceptable    | Specimen Type            |
| Pain Level Response      | Speech                   |
| Pain Location            | Strength L Arm           |
| Pain Management          | Strength L Leg           |
| Pain Present             | Strength R Arm           |
| Pain Type                | Strength R Leg           |
| Parameters Checked       | Support Systems          |
| Phosphate                | Temp Site                |
| Phosphorous              | Temperature F            |
| Platelet Count           | Therapeutic Bed          |
| Position                 | Tobacco Use History      |
| PostTib Pulses L         | Turn                     |
| PostTib Pulses R         | Untoward Effect          |
| Potassium                | Urea Nitrogen            |
| Potassium (serum)        | Urine Source             |
| Potassium, Whole Blood   | Verbal Response          |
| Pressure Reducing Device | Visual / hearing deficit |
| Pressure Ulcer Present   | WBC                      |
| Pupil Response L         | White Blood Cells        |
| Pupil Response R         | Yeast                    |
| Pupil Size Left          | admit_age                |
| Pupil Size Right         | gender                   |
| RBC                      | pCO2                     |
| RDW                      | pH                       |
| RLE Color                | pO2                      |
| RLE Temp                 |                          |
| RLL Lung Sounds          |                          |
| RR                       |                          |
| RUE Color                |                          |
| RUE Temp                 |                          |

F.3. Missingness heatmaps

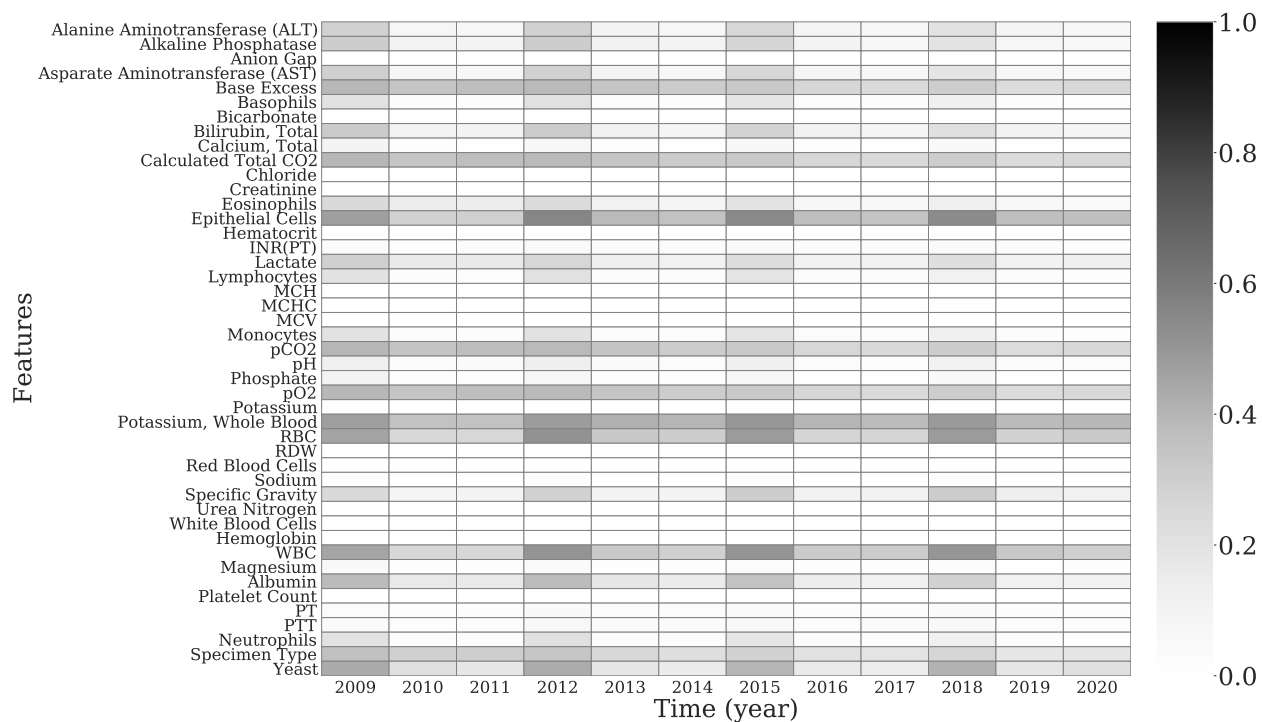

Figure 25: Missingness over time for labevents features in MIMIC-IV dataset after cohort selection. The darker the color, the larger the proportion of missing data.

EVALUATING MODEL PERFORMANCE IN MEDICAL DATASETS OVER TIME

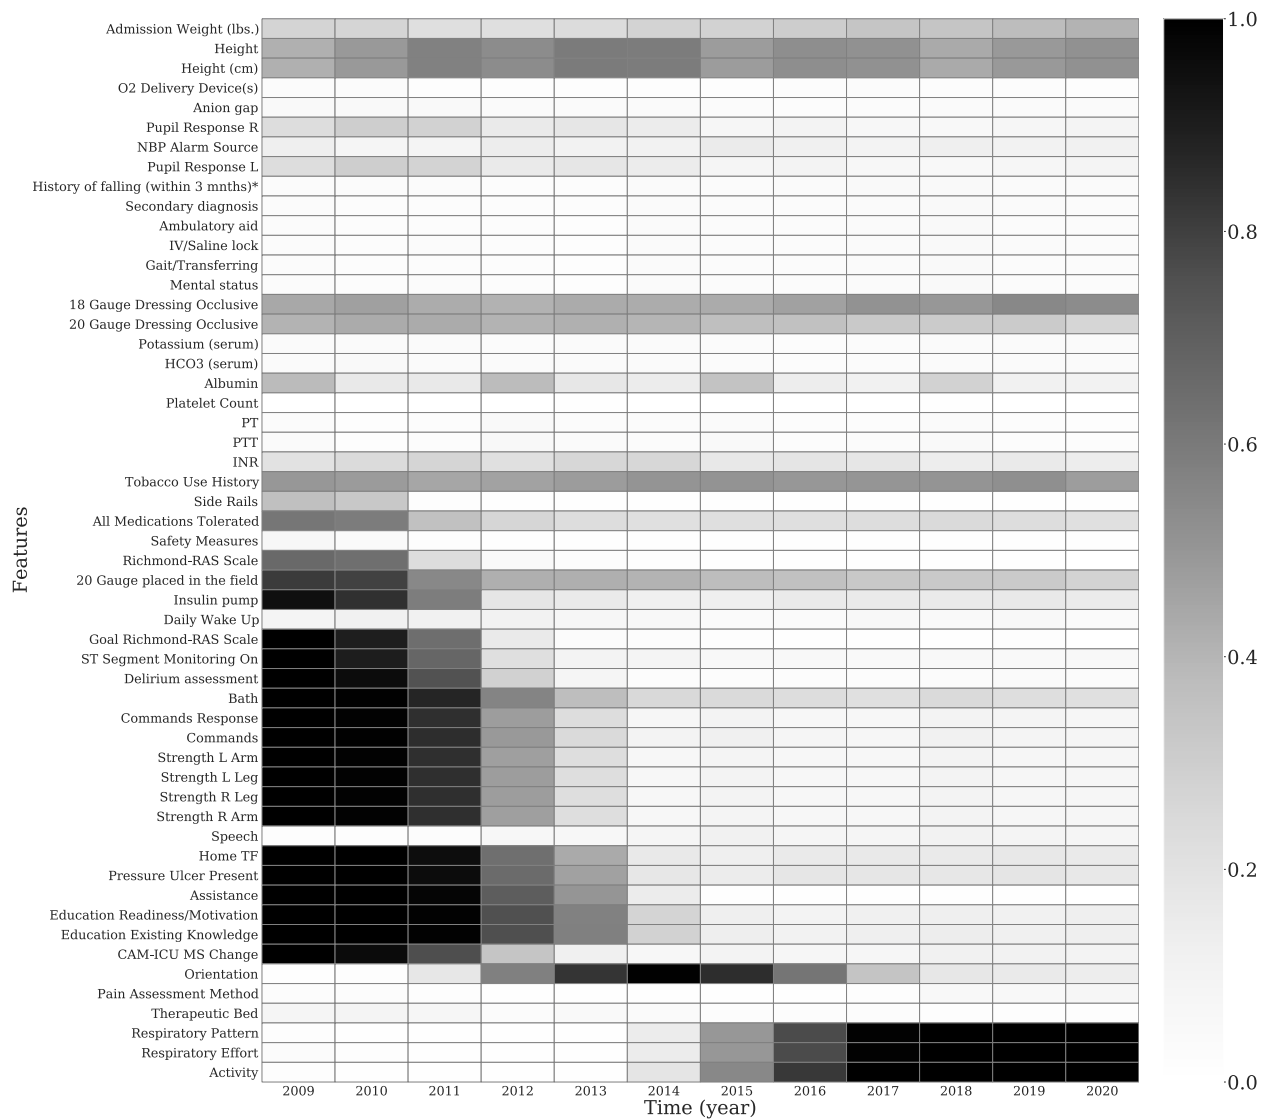

Figure 26: Missingness over time for chartevents features in MIMIC-IV dataset after cohort selection. The darker the color, the larger the proportion of missing data. (part 1)

EVALUATING MODEL PERFORMANCE IN MEDICAL DATASETS OVER TIME

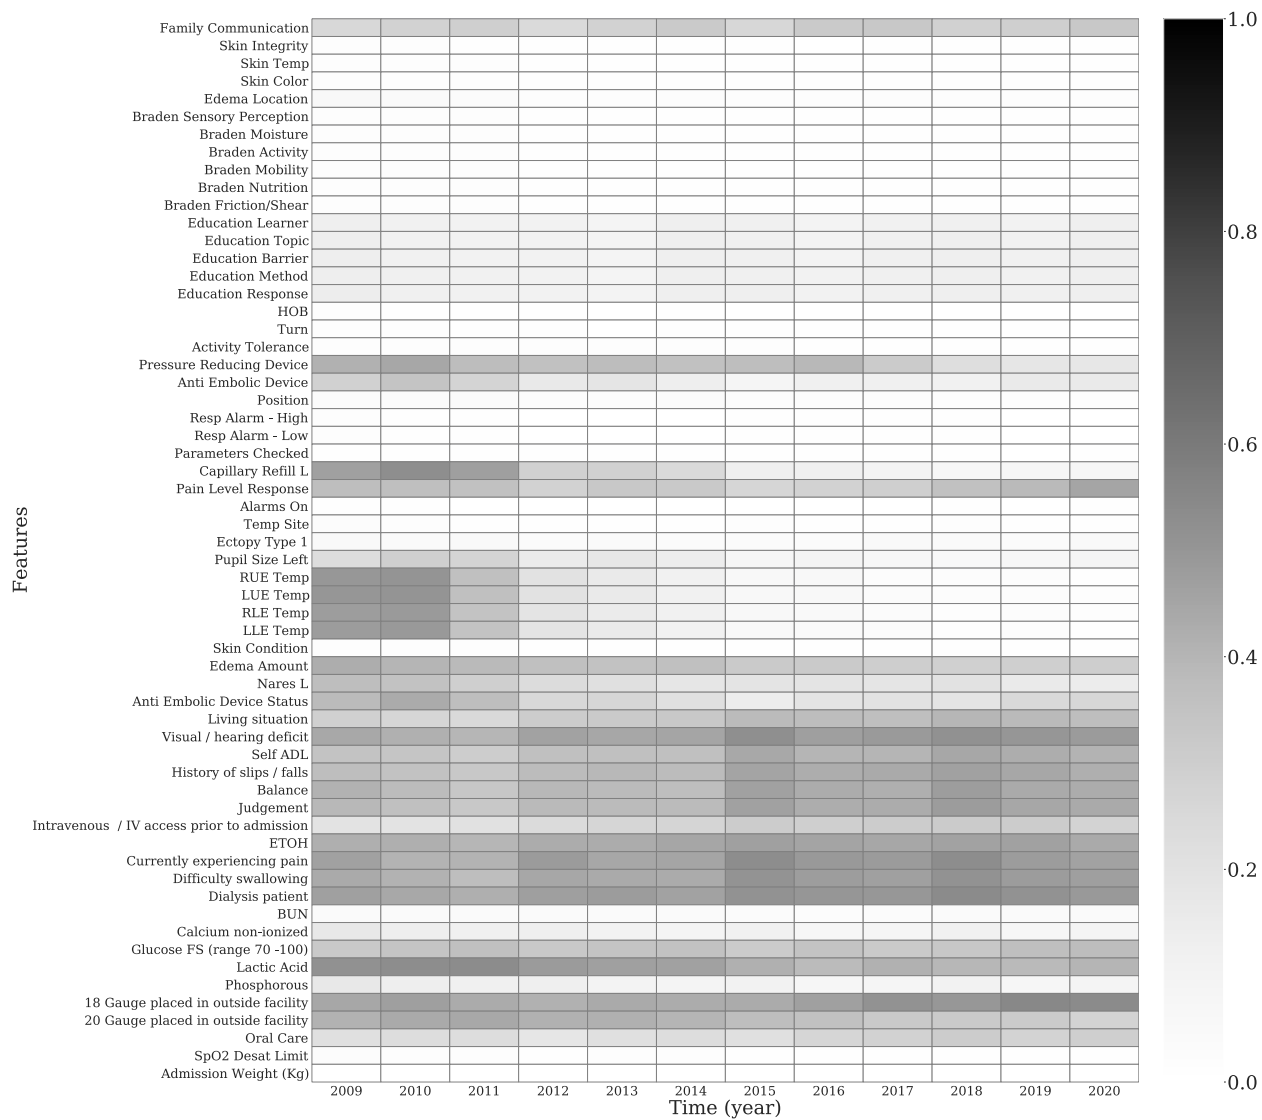

Figure 27: Missingness over time for chartevents features in MIMIC-IV dataset after cohort selection. The darker the color, the larger the proportion of missing data. (part 2)

EVALUATING MODEL PERFORMANCE IN MEDICAL DATASETS OVER TIME

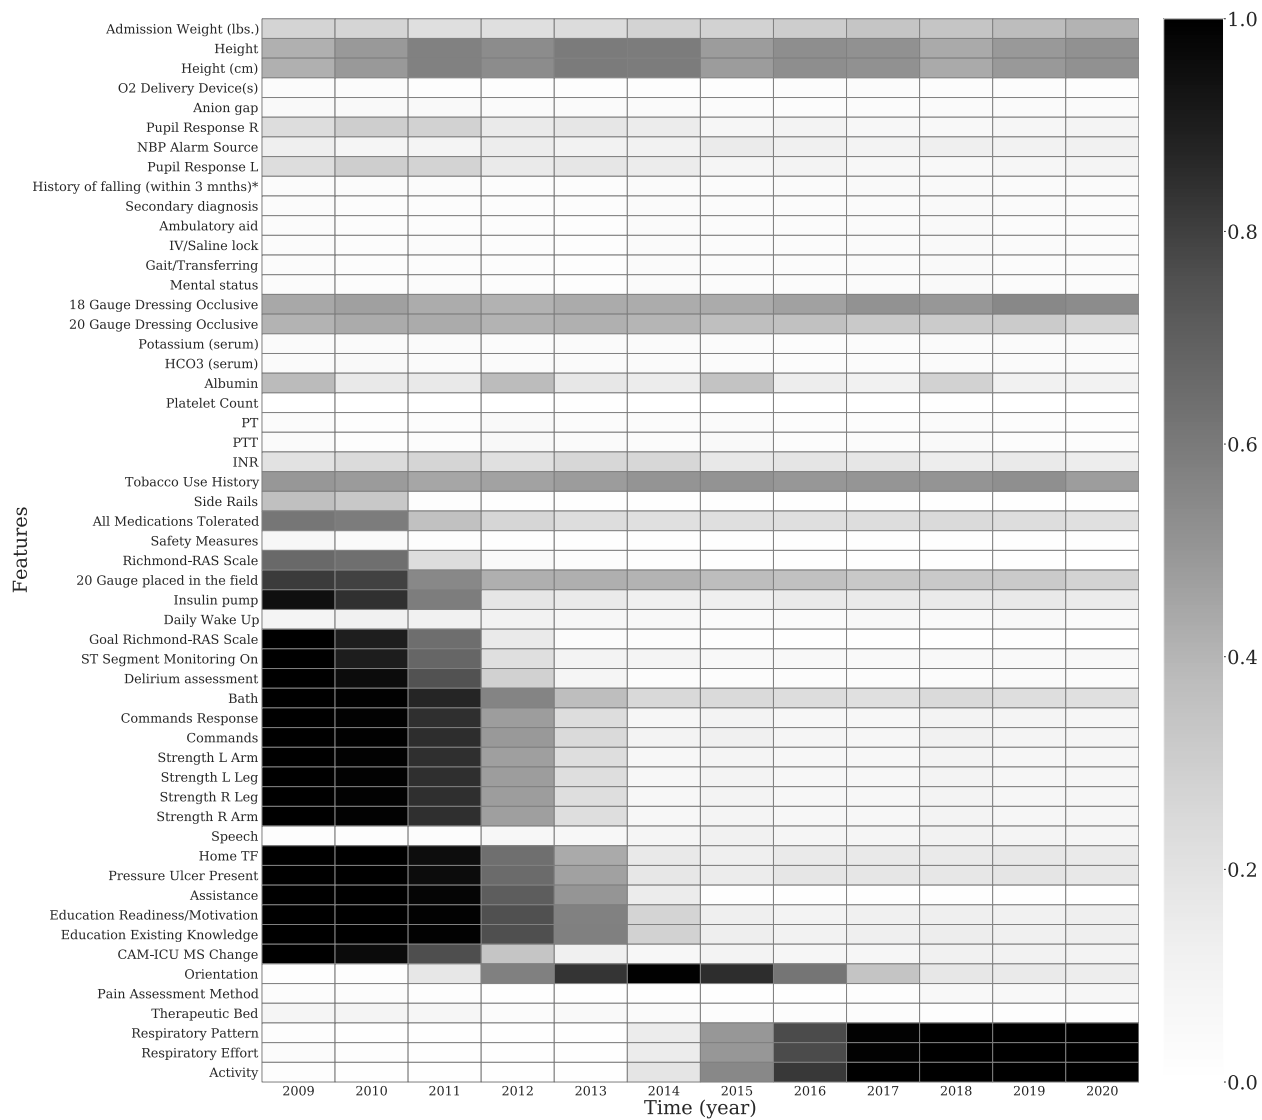

Figure 28: Missingness over time for chartevents features in MIMIC-IV dataset after cohort selection. The darker the color, the larger the proportion of missing data. (part 3)

## Appendix G. Additional OPTN (Liver) Data Details

The Organ Procurement and Transplantation Network (OPTN) database [Organ Procurement and Transplantation Network \(2020\)](#) tracks organ donation and transplant events in the U.S. Our study uses data from candidates on the liver transplant wait list. The performance over time is evaluated on a *yearly* basis.

- First, we provide the disclaimer: “The data reported here have been supplied by the United Network for Organ Sharing as the contractor for the Organ Procurement and transplantation Network. The interpretation and reporting of these data are the responsibility of the author(s) and in no way should be seen as an official policy of or interpretation by the OPTN or the U.S. Government”.
- Data access: After signing the Data Use Agreement - I from Organ Procurement And Transplantation network, users can access the OPTN (Liver) dataset.
- Cohort selection: The cohort consists of liver transplant candidates on the waiting list (2005-2017). We follow the same pipeline as [Byrd et al. \(2021\)](#) to extract the data, except that we select the first record for each patient. Cohort selection diagrams are given in Figures 29. This corresponds to a particular interpretation of the prediction: when a patient is first added to the transplant list, given what we know about that patient, what is their estimated risk of 180-day mortality?
- Outcome definition: 180-day mortality from when the patient was first added to the list
- Cohort characteristics: Cohort characteristics are given in Table 9.
- Features: We list the features used in the OPTN liver dataset in Section G.2. We convert all categorical variables into dummy features, and apply standard scaling to numerical variables (subtract mean and divide by standard deviation).
- Missingness heat maps: are given in Figures 30 and 31.



## G.1. Cohort Selection and Cohort Characteristics

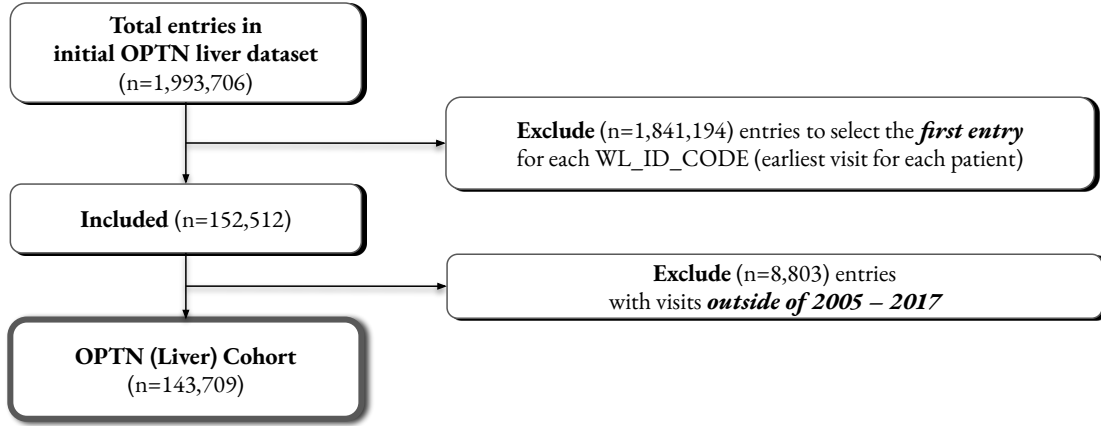

Figure 29: Cohort selection diagram - OPTN (Liver)

Table 9: OPTN (Liver) cohort characteristics, with count (%) or median (Q1 – Q3).

| Feature name (value)     |                       | Empty (ratio) | Type        |
|--------------------------|-----------------------|---------------|-------------|
| <b>Gender</b>            |                       |               |             |
| Male                     | 92,560 (64.4%)        | –             | categorical |
| Female                   | 51,149 (35.6%)        | –             | categorical |
| <b>INIT_AGE</b>          | 56 (49-62)            | 0.0%          | continuous  |
| <b>FUNC_STAT_TCR</b>     | 2,070 (2,050-2,080)   | 0.0%          | categorical |
| <b>INIT_OPO_CTR_CODE</b> | 11,036 (3,782-19,282) | 0.0%          | categorical |
| <b>ALBUMIN</b>           | 3 (3-4)               | 0.0%          | continuous  |
| <b>HCC_DIAGNOSIS_TCR</b> |                       |               |             |
| No                       | 31,390 (21.8%)        | –             | categorical |
| Yes                      | 11,312 (7.9%)         | –             | categorical |
| Missing                  | 101,007 (70.3%)       | –             | categorical |
| <b>PERM_STATE</b>        |                       |               |             |
| CA                       | 19,645 (13.7%)        | –             | categorical |
| TX                       | 14,692 (10.2%)        | –             | categorical |
| NY                       | 9,976 (6.9%)          | –             | categorical |
| GA                       | 4,052 (2.8%)          | –             | categorical |
| MD                       | 4,050 (2.8%)          | –             | categorical |
| FL                       | 7,602 (5.3%)          | –             | categorical |
| PA                       | 8,013 (5.6%)          | –             | categorical |
| MI                       | 3,989 (2.8%)          | –             | categorical |
| Other                    | 71,007 (49.4%)        | –             | categorical |
| <b>EDUCATION</b>         | 4 (3-5)               | 0.0%          | categorical |
| <b>ASCITES</b>           | 2 (1-2)               | 0.0%          | categorical |
| <b>MORTALITY_180D</b>    |                       |               |             |
| 1                        | 4,635 (3.2%)          | –             | categorical |
| 0                        | 139,074 (96.8%)       | –             | categorical |

## G.2. Features

ABO  
BACT\_PERIT\_TCR  
CITIZENSHIP  
DGN\_TCR  
DGN2\_TCR  
DIAB  
EDUCATION  
FUNC\_STAT\_TCR  
GENDER  
LIFE\_SUP\_TCR  
MALIG\_TCR  
OTH\_LIFE\_SUP\_TCR  
PERM\_STATE  
PORTAL\_VEIN\_TCR  
PREV\_AB\_SURG\_TCR  
PRI\_PAYMENT\_TCR  
REGION  
TIPSS\_TCR  
VENTILATOR\_TCR  
WORK\_INCOME\_TCR  
ETHCAT  
HCC\_DIAGNOSIS\_TCR  
MUSCLE\_WAST\_TCR  
INIT\_OPO\_CTR\_CODE  
WLHR  
WLIN  
WLKI  
WLLU  
WLPA  
INACTIVE  
ASCITES  
ENCEPH  
DIALYSIS\_PRIOR\_WEEK  
INIT\_HGT\_CM  
INIT\_WGT\_KG  
INIT\_BMI\_CALC  
INIT\_AGE  
UNOS\_CAND\_STAT\_CD  
BILIRUBIN  
SERUM\_CREAT  
INR  
SERUM\_SODIUM  
ALBUMIN  
BILIRUBIN\_DELTA  
SERUM\_CREAT\_DELTA  
INR\_DELTA  
SERUM\_SODIUM\_DELTA  
ALBUMIN\_DELTA

G.3. Missingness heatmaps

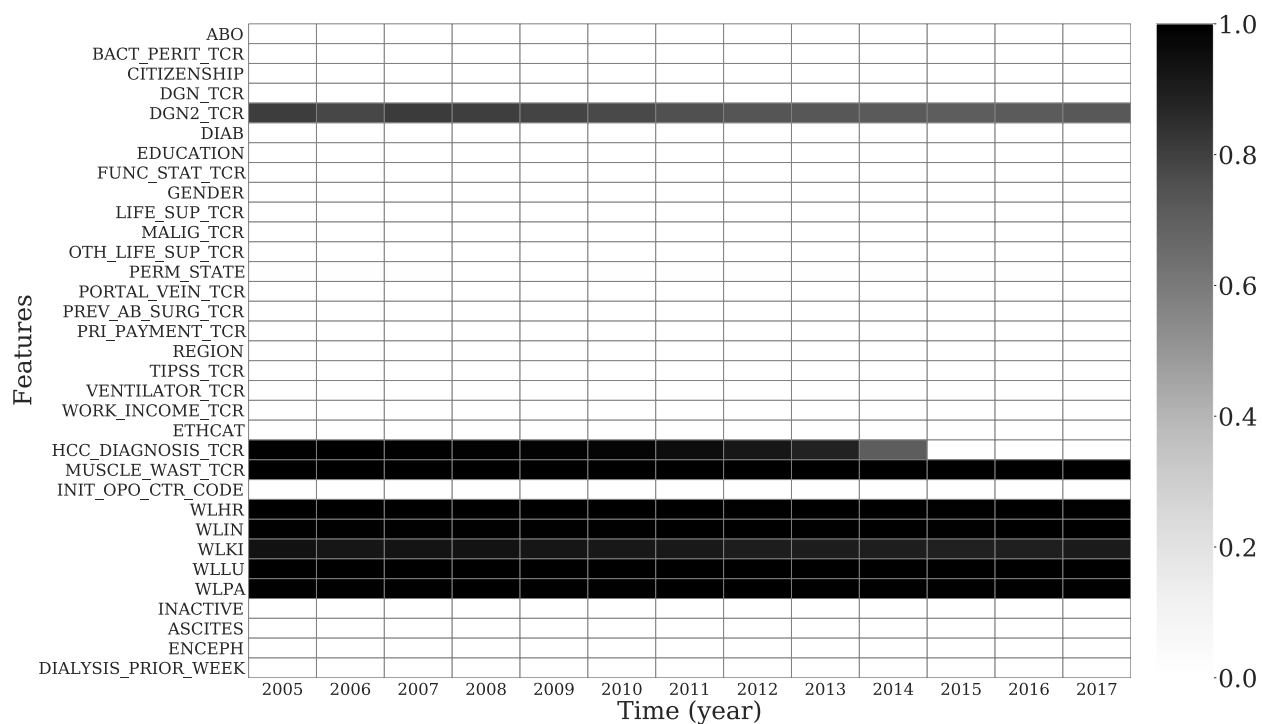

Figure 30: Missingness over time for categorical features in OPTN (Liver) dataset after cohort selection. The darker the color, the larger the proportion of missing data.

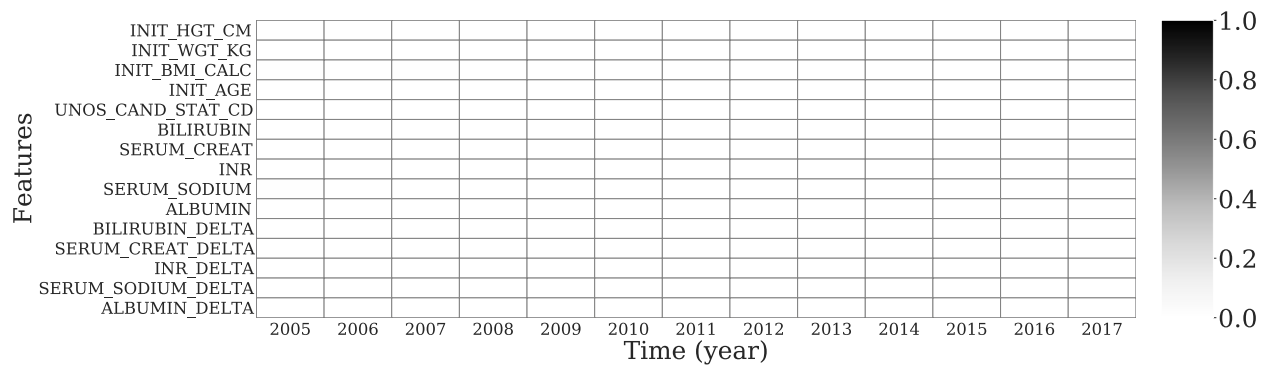

Figure 31: Missingness over time for numerical features in OPTN (Liver) dataset after cohort selection. The darker the color, the larger the proportion of missing data. (Near-zero missingness here.)

## Appendix H. Additional MIMIC-CXR Data Details

The MIMIC Chest X-ray (MIMIC-CXR-JPG) (Johnson et al., 2019b) is a publicly available dataset containing chest radiographs in JPG format from 2009–2018. Similar to MIMIC-IV, MIMIC-CXR add time annotations placing each sample into a three-year time range. We approximate the year of each sample by taking the midpoint of its time range. Each patient has an `anchor_year_group`, `anchor_year` and `StudyDate`. For each patient, we first calculated an offset as the difference between `StudyDate` and `anchor_year`. Then, we approximated the admit time as the midpoint of `anchor_year_group` after applying the computed offset. The performance over time is evaluated on a *yearly* basis. Our study uses MIMIC-IV-JPG-2.0. A similar training setup to that in Seyyed-Kalantari et al. (2020) was used (learning rate, architecture, data augmentation, stopping criteria, etc.).

- Data access: Users must create a Physionet account, become credentialed, and sign a data use agreement (DUA).
- Cohort selection: We removed the records from 2009 due to the tiny sample size. (Selection diagram in Figure 32). We keep all records for each patients and split the data based on patient `subject id`.
- Outcome definition: The outcome is the probabilities of all labels given the input images. The labels includes 13 abnormal outcomes and 1 normal outcome. (Atelectasis, Cardiomegaly, Consolidation, Edema, Enlarged Cardiomediastinum, Fracture, Lung Lesion, Lung Opacity, Pleural Effusion, Pneumonia, Pneumothorax, Pleural Other, Support Devices, No Finding)
- Cohort characteristics: Cohort characteristics are given in Table 10.

### H.1. Cohort Selection and Cohort Characteristics

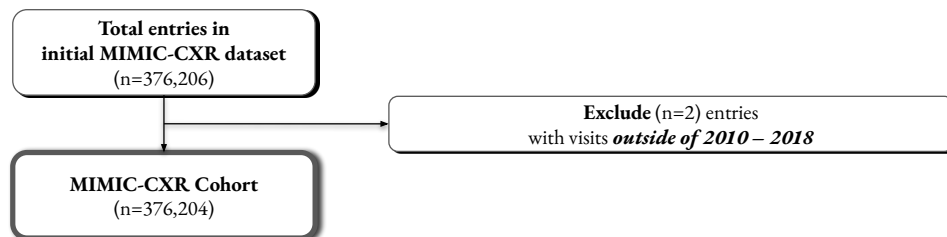

Figure 32: Cohort selection diagram - MIMIC-CXR

Table 10: MIMIC-CXR cohort characteristics, with count (%) or median (Q1–Q3).

| Feature name (value)      | Summary statistic | Empty (ratio) | Status      |
|---------------------------|-------------------|---------------|-------------|
| <b>Gender</b>             |                   |               |             |
| F                         | 179,765 (47.8%)   | –             | categorical |
| M                         | 196,439 (52.2%)   | –             | categorical |
| <b>Age</b>                | 64 (51-76)        | 0.0%          | continuous  |
| <b>Diseases</b>           |                   |               |             |
| Atelectasis               | 65,390 (17.4%)    | –             | categorical |
| Cardiomegaly              | 56,404 (15.0%)    | –             | categorical |
| Consolidation             | 14,394 (3.8%)     | –             | categorical |
| Edema                     | 36,026 (9.6%)     | –             | categorical |
| Enlarged Cardiomedastinum | 9,821 (2.6%)      | –             | categorical |
| Fracture                  | 6,314 (1.7%)      | –             | categorical |
| Lung Lesion               | 10,574 (2.8%)     | –             | categorical |
| Lung Opacity              | 76,074 (20.2%)    | –             | categorical |
| Pleural Effusion          | 75,526 (20.1%)    | –             | categorical |
| Pleural Other             | 3,432 (0.9%)      | –             | categorical |
| Pneumonia                 | 25,065 (6.7%)     | –             | categorical |
| Pneumothorax              | 12,828 (3.4%)     | –             | categorical |
| Support Devices           | 69,148 (18.4%)    | –             | categorical |
| No Finding                | 167,116 (44.4%)   | –             | categorical |

H.2. Label level AUROC over time for MIMIC-CXR

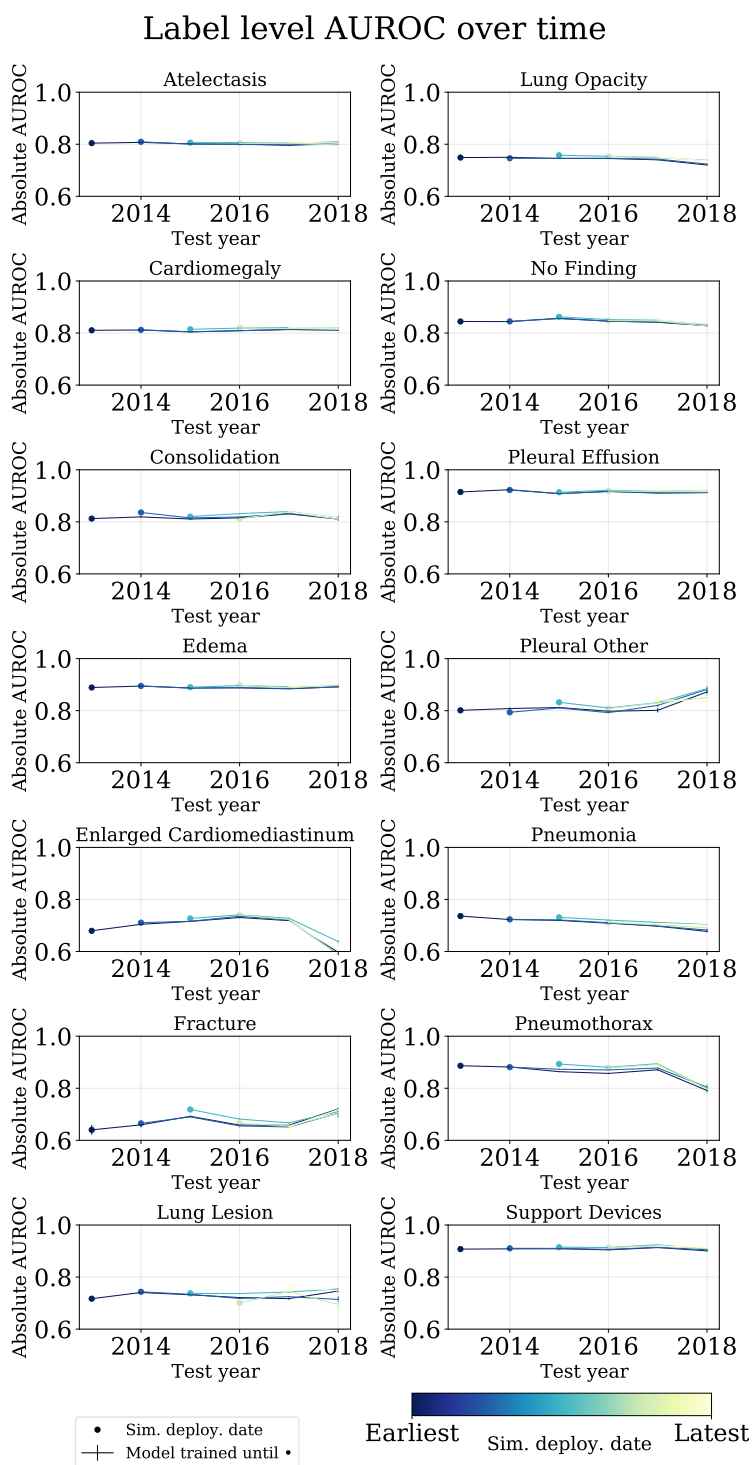

Figure 33: Absolute AUROC over time of each label in MIMIC-CXR

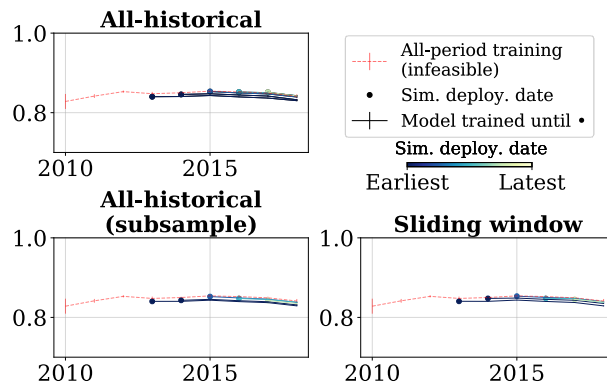

Figure 34: Weighted test AUROC vs. year for the DenseNet architecture on MIMIC-CXR.

Table 11: MIMIC-CXR label-level AUROC from time-agnostic evaluation of all-period training. The format is mean ( $\pm$ std. dev. across splits)

| Label                      | AUROC                | Label         | AUROC                |
|----------------------------|----------------------|---------------|----------------------|
| Atelectasis                | 0.826 ( $\pm$ 0.003) | Cardiomegaly  | 0.837 ( $\pm$ 0.002) |
| Consolidation              | 0.841 ( $\pm$ 0.003) | Edema         | 0.904 ( $\pm$ 0.002) |
| Enlarged Cardiomediastinum | 0.759 ( $\pm$ 0.005) | Fracture      | 0.745 ( $\pm$ 0.006) |
| Lung Lesion                | 0.784 ( $\pm$ 0.003) | Lung Opacity  | 0.770 ( $\pm$ 0.002) |
| Pleural Effusion           | 0.929 ( $\pm$ 0.001) | Pleural Other | 0.844 ( $\pm$ 0.009) |
| Pneumonia                  | 0.755 ( $\pm$ 0.004) | Pneumothorax  | 0.918 ( $\pm$ 0.006) |
| Support Devices            | 0.928 ( $\pm$ 0.001) | No Finding    | 0.876 ( $\pm$ 0.002) |

## Appendix I. Logistic Regression Coefficients from Splitting by Patient

To help with intuition in important features for the predictive task on each dataset, here we have the coefficients of logistic regression models trained from splitting by patient.

Table 12: SEER (Breast) top 10 important features for LR models, all-period training.

| Feature                                      | Coefficient |
|----------------------------------------------|-------------|
| SEER historic stage A (1973-2015)_Distant    | -2.113944   |
| SEER historic stage A (1973-2015)_Localized  | 1.676493    |
| Regional nodes examined (1988+)_95.0         | -1.167844   |
| CS lymph nodes (2004-2015)_750               | 1.100824    |
| CS lymph nodes (2004-2015)_755               | 1.023753    |
| Histologic Type ICD-O-3_8530                 | -0.913494   |
| Histologic Type ICD-O-3_8543                 | 0.902798    |
| Breast - Adjusted AJCC 6th T (1988-2015)_T4d | 0.899491    |
| Histologic Type ICD-O-3_8211                 | 0.877848    |
| EOD 10 - extent (1988-2003)_85               | -0.791136   |

Table 13: SEER (Colon) top 10 important features for LR models, all-period training.

| Feature                                                                                                        | Coefficient |
|----------------------------------------------------------------------------------------------------------------|-------------|
| Reason no cancer-directed surgery_Surgery performed                                                            | 2.360161    |
| Regional nodes positive (1988+)_00                                                                             | 1.897706    |
| Regional nodes positive (1988+)_01                                                                             | 1.872008    |
| modified AJCC stage 3rd (1988-2003)_40                                                                         | -1.787481   |
| EOD 10 - extent (1988-2003)_13                                                                                 | 1.766066    |
| Reason no cancer-directed surgery_Not recommended, contraindicated due to other cond; autopsy only (1973-2002) | -1.752474   |
| EOD 10 - extent (1988-2003)_85                                                                                 | -1.732619   |
| EOD 10 - extent (1988-2003)_70                                                                                 | -1.704333   |
| CS mets at dx (2004-2015)_99                                                                                   | 1.619905    |
| CS mets at dx (2004-2015)_00                                                                                   | 1.609454    |



Table 14: SEER (Lung) top 10 important features for LR models, all-period training.

| Feature                                                    | Coefficient |
|------------------------------------------------------------|-------------|
| Histologic Type ICD-O-3.8240                               | 2.514539    |
| EOD 4 - nodes (1983-1987)_0                                | 2.074730    |
| EOD 4 - nodes (1983-1987)_7                                | -1.777530   |
| EOD 10 - size (1988-2003)_140                              | -1.587893   |
| Histologic Type ICD-O-3.8141                               | -1.546566   |
| CS tumor size (2004-2015)_998.0                            | -1.515856   |
| EOD 4 - nodes (1983-1987)_6                                | -1.497022   |
| Type of Reporting Source_Nursing/convalescent home/hospice | -1.338998   |
| CS mets at dx (2004-2015)_51                               | -1.326595   |
| EOD 10 - size (1988-2003)_150                              | -1.326196   |

Table 15: CDC COVID-19 top 10 important features for LR models, all-period training.

| Feature                 | Coefficient |
|-------------------------|-------------|
| res.state.DE            | 2.202055    |
| age_group_0 - 9 Years   | -2.114818   |
| age_group_80+ Years     | 1.965279    |
| age_group_10 - 19 Years | -1.681099   |
| res.state.GA            | 1.391469    |
| age_group_70 - 79 Years | 1.379589    |
| res.county_WICHITA      | 1.290644    |
| age_group_20 - 29 Years | -1.189734   |
| res.county_SUMNER       | -1.135073   |
| mechvent_yn_Yes         | 1.117372    |

Table 16: SWPA COVID-19 top 10 important features for LR models according to experiments splitting by patient.

| Feature                                                                             | Coefficient |
|-------------------------------------------------------------------------------------|-------------|
| age_bin_(70, 200]_0                                                                 | -0.781337   |
| age_bin_(70, 200]_1                                                                 | 0.780673    |
| medication_FENTANYL (PF) 50 MCG/ML INJECTION SOLUTION_0.0                           | 0.651419    |
| medication_EPINEPHRINE 0.3 MG/0.3 ML INJECTION, AUTO-INJECTOR_nan                   | -0.627565   |
| medication_HYDROCORTISONE SOD SUCCINATE (PF) 100 MG/2 ML SOLUTION FOR INJECTION_0.0 | 0.544222    |
| medication_HYDROCODONE 5 MG-ACETAMINOPHEN 325 MG TABLET_nan                         | -0.520368   |
| medication_DEXAMETHASONE SODIUM PHOSPHATE 4 MG/ML INJECTION SOLUTION_0.0            | 0.502954    |
| medication_ASPIRIN 81 MG TABLET,DELAYED RELEASE_nan                                 | -0.479100   |
| bmi_nan                                                                             | -0.427569   |
| age_bin_(60, 70]_0                                                                  | -0.380688   |

Table 17: MIMIC-IV top 10 important features for LR models, all-period training.

| Feature                              | Coefficient |
|--------------------------------------|-------------|
| O2 Delivery Device(s)_None           | -0.307334   |
| Eye Opening_None                     | 0.301737    |
| admit_age                            | 0.299712    |
| O2 Delivery Device(s)_Nasal cannula  | -0.248463   |
| Motor Response_Obeys Commands        | -0.230931   |
| Pupil Response L_Non-reactive        | 0.223776    |
| Richmond-RAS Scale_ 0 Alert and calm | -0.205476   |
| Temp Site_Blood                      | -0.204514   |
| HR_0.0                               | 0.197299    |
| Diet Type_NPO                        | 0.195156    |

Table 18: OPTN (Liver) top 10 important features for LR models, all-period training.

| Feature                | Coefficient |
|------------------------|-------------|
| SERUM_CREAT_DELTA      | 0.660589    |
| FUNC_STAT_TCR_2020.0   | 0.241507    |
| FUNC_STAT_TCR_2080.0   | -0.236288   |
| DGNC_4110.0            | -0.234680   |
| REGION_5.0             | 0.223940    |
| EDUCATION_998.0        | 0.218549    |
| ASCITES_3.0            | 0.218329    |
| ASCITES_1.0            | -0.214076   |
| INIT_OPO_CTR_CODE_1054 | -0.209265   |
| INIT_OPO_CTR_CODE_4743 | -0.207778   |

## Appendix J. Diagnostic plots

We took the union of the top  $k$  most important features from each time point to be included in the diagnostic plots, where  $k$  was tuned depending on the dataset so that the resulting plots would not be overcrowded. For categorical features, we additionally highlighted (using a thicker line) features that had consistently high prevalence ( $\geq p$ ) or experienced a large change in prevalence across one time point ( $\geq \Delta$ ). The specific parameters of each dataset are defined in each subsection. For numerical features, we highlighted features whose average ranking across all time points was  $\leq 3$  (also chosen to avoid overcrowding).

### J.1. SEER (Breast)

For SEER (Breast) diagnostic plots, important features were selected using  $k = 5, p = 0.4, \Delta = 0.2$ .

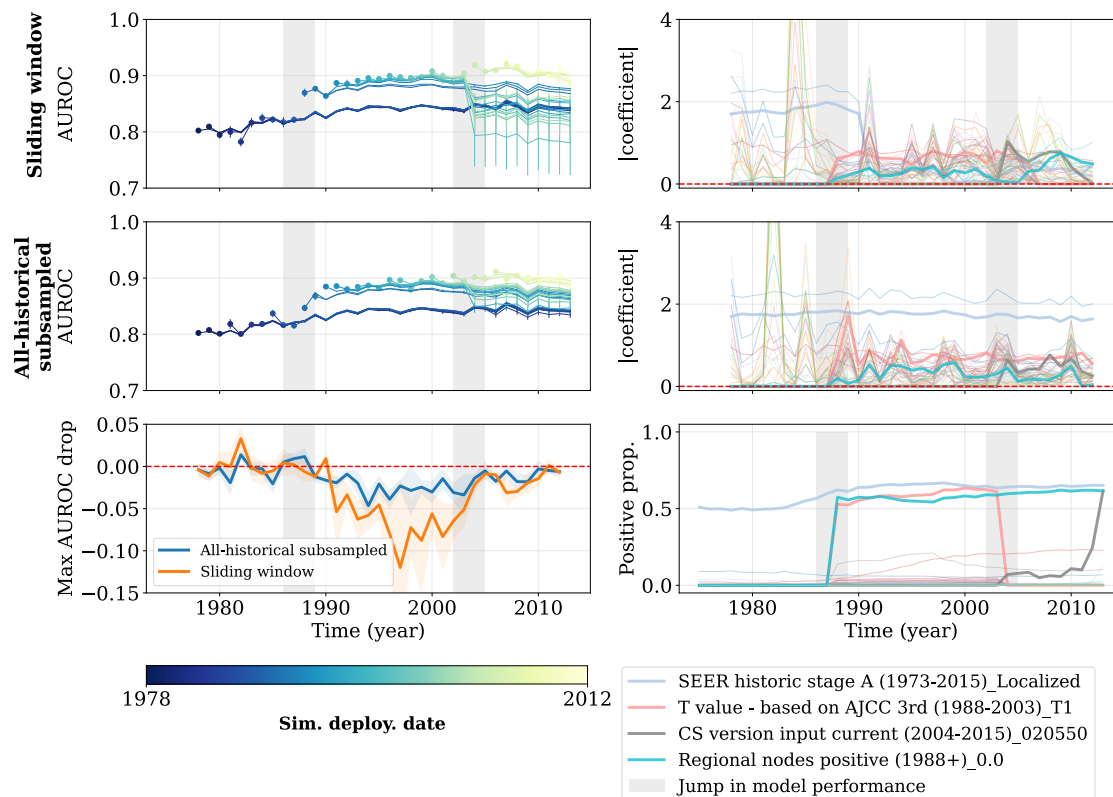

Figure 35: Diagnostic plot of SEER (Breast) dataset. The important features are selected as the union of the top 5 features that have the highest absolute value model coefficients. The left column includes AUROC versus time for both sliding window and all-historical subsampled, and the maximum AUROC drop for each trained model. The right column provides the absolute coefficients of each trained model from both regimes, and positive proportion of the significant features over time. As shown in the gray highlighted region, there are jumps in performance around 1988 and 2003, which coincides with the introducing and removal of several features (e.g. T value - based on AJCC 3rd (1988-2003)\_T1). The latency of jumps in coefficients are caused by length of sliding window.

**J.2. SEER (Colon)**

For SEER (Colon) diagnostic plots, important features were selected using  $k = 3, p = 0.4, \Delta = 0.2$ .

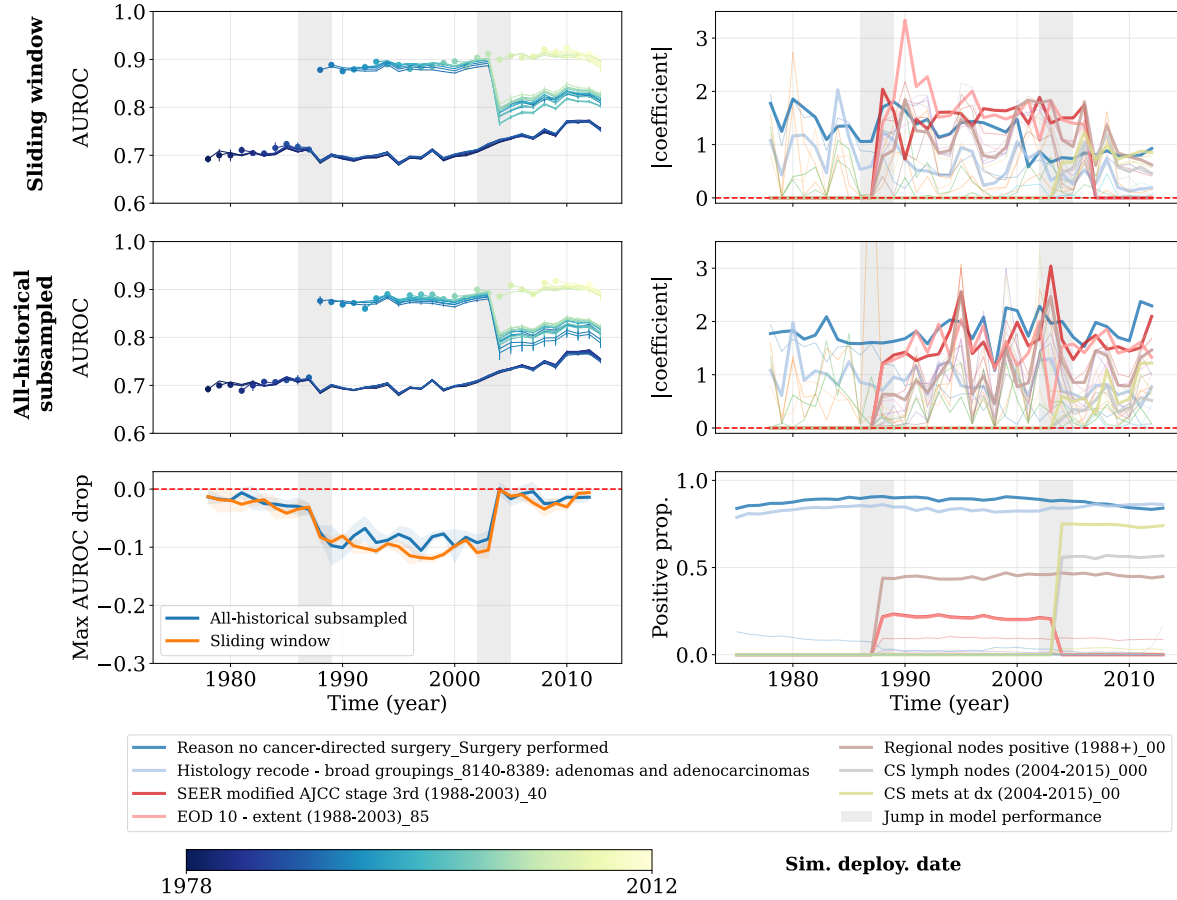

Figure 36: Diagnostic plot of SEER (Colon) dataset. The important features are selected as the union of the top 3 features that have the highest absolute model coefficients. The left column includes AUROC versus time for both sliding window and all-historical subsampled, and the maximum AUROC drop for each trained model. The right column provides the absolute coefficients of each trained model from both regimes, and positive proportion of the significant features over time. As shown in the gray highlighted region, there are jumps in performance around 1988 and 2003, which coincides with the introducing and removal of several features (e.g. SEER modified AJCC stage 3rd (1988-2003)\_40). The latency of jumps in coefficients are caused by length of sliding window.

### J.3. SEER (Lung)

For SEER (Lung) diagnostic plots, important features were selected using  $k = 5, p = 0.2, \Delta = 0.2$ .

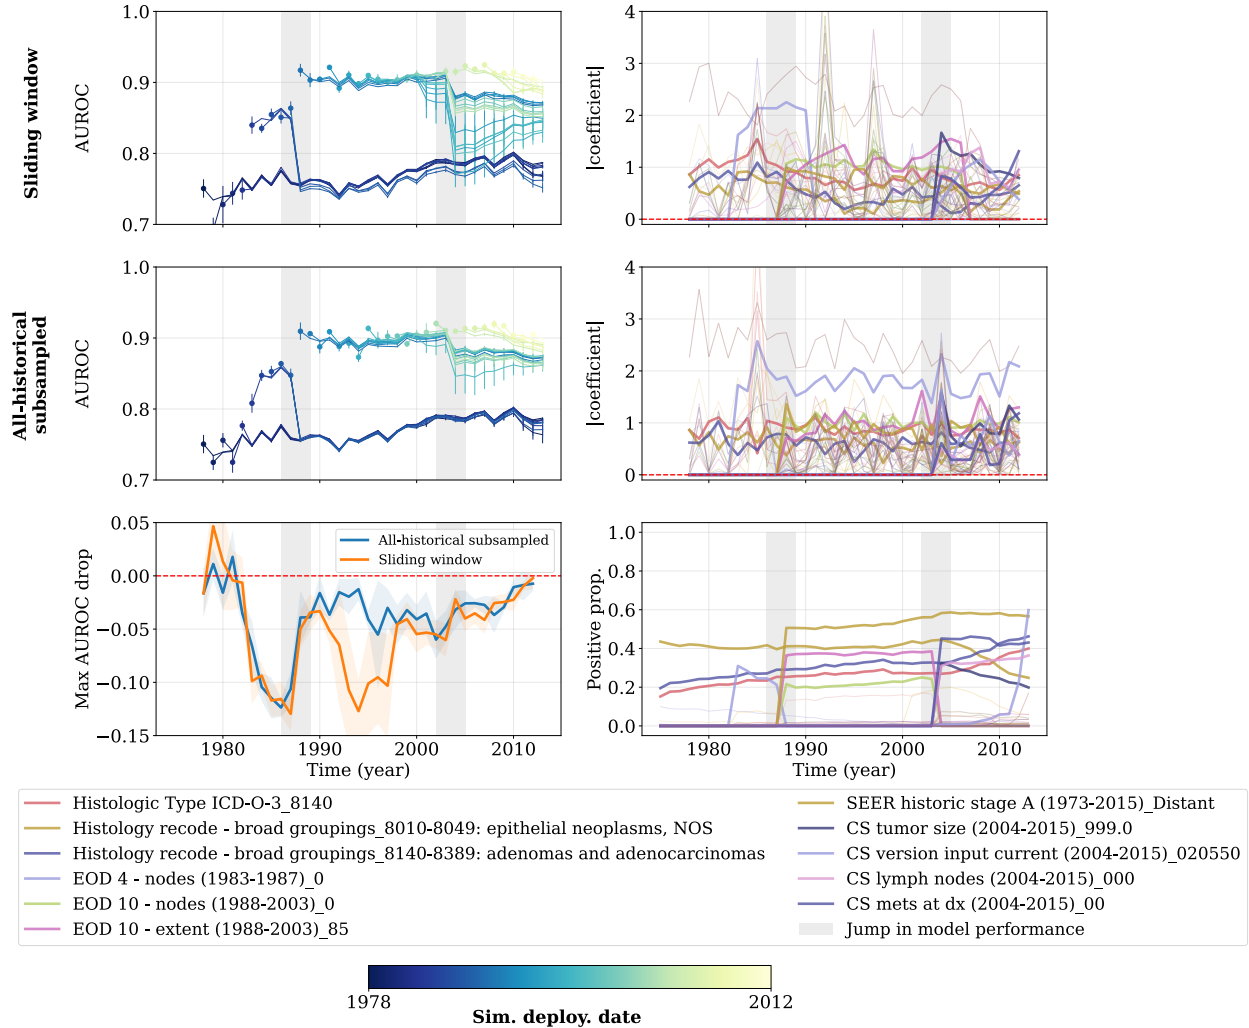

Figure 37: Diagnostic plot of SEER (Lung) dataset. The important features are selected as the union of the top 5 features that have the highest absolute model coefficients. The left column includes AUROC versus time for both sliding window and all-historical subsampled, and the maximum AUROC drop for each trained model. The right column provides the absolute coefficients of each trained model from both regimes, and positive proportion of the significant features over time. As shown in the gray highlighted region, there are jumps in performance around 1988 and 2003, which coincides with the introducing and removal of several features (e.g. EOD 10 - nodes (1988-2013)\_0 & EOD 10 - extent (1988-2003)\_85). The latency of jumps in coefficients are caused by length of sliding window.

J.4. CDC COVID-19

For CDC COVID-19 diagnostic plots, important features were selected using  $k = 5, p = 0.15, \Delta = 0.15$ .

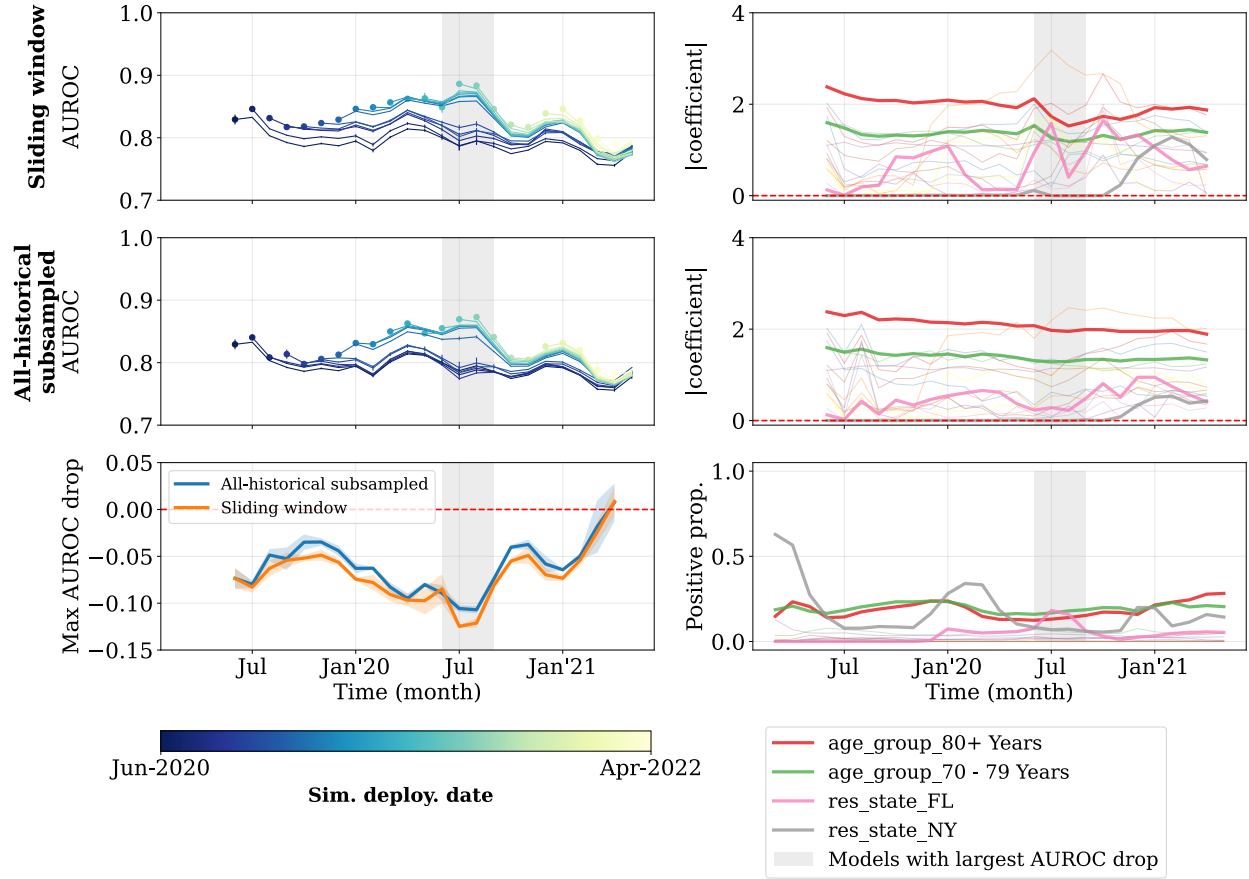

Figure 38: Diagnostic plot of CDC COVID-19. The important features are selected as the union of the top 5 features that have the highest absolute model coefficients. The left column includes AUROC versus time for both sliding window and all-historical subsampled, and the maximum AUROC drop for each trained model. The right column provides the absolute coefficients of each trained model from both regimes, and positive proportion of the significant features over time. As shown in the gray highlighted region, the models trained around June 2021 suffer the largest maximum AUROC drop, coinciding with a shift in distribution of ages (Figure 18(a)) and states (Figure 18(b)). The latency of jumps in coefficients are caused by length of sliding window.

**J.5. SWPA COVID-19**

For SWPA COVID-19 diagnostic plots, important features were selected using  $k = 3, p = 0.4, \Delta = 0.2$ .

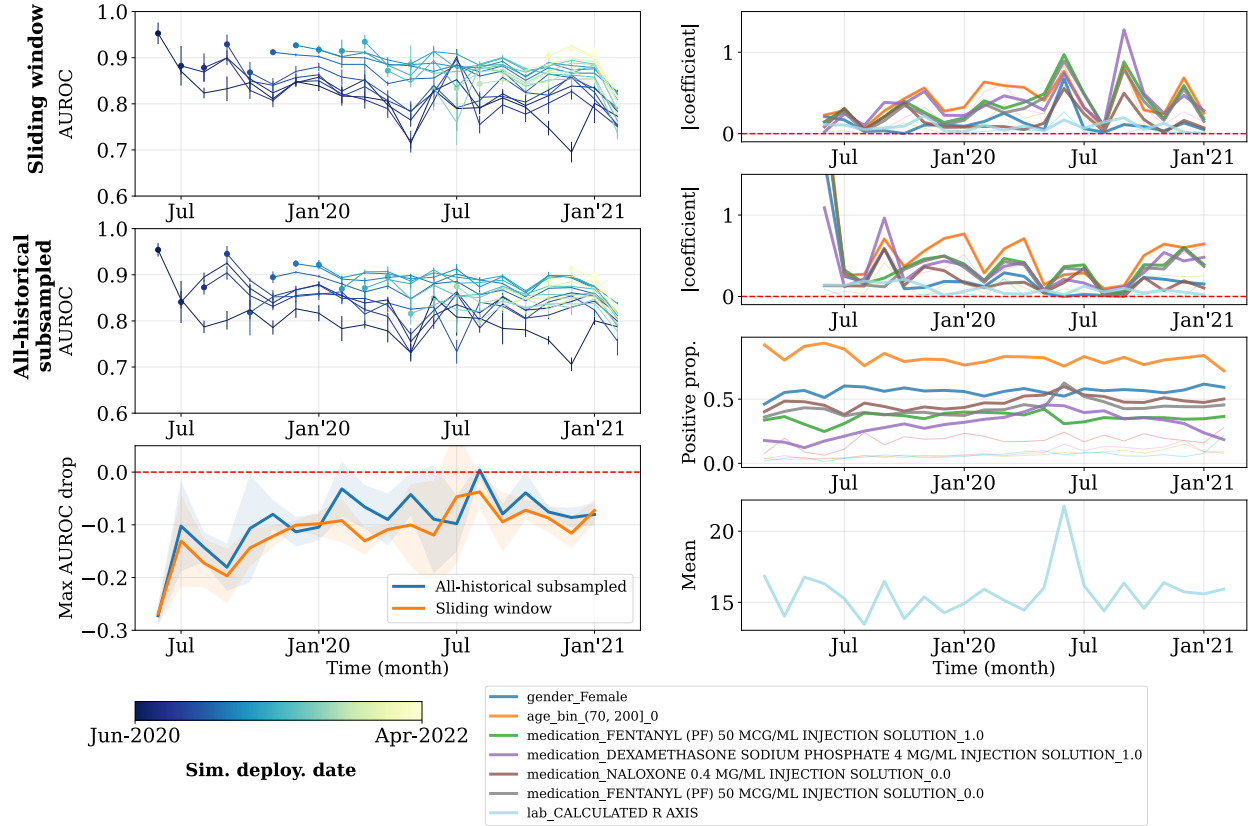

Figure 39: Diagnostic plot of SWPA COVID-19. The important features are selected as the union of the top 3 features that have the highest absolute model coefficients. The left column includes AUROC versus time for both sliding window and all-historical subsampled, and the maximum AUROC drop for each trained model. The right column provides the absolute coefficients of each trained model from both regimes, and positive proportion of the significant features over time. One of the hypotheses for relatively large uncertainty is smaller sample size.

### J.6. MIMIC-IV

For MIMIC-IV diagnostic plots, important features were selected using  $k = 3, p = 0.4, \Delta = 0.2$ .

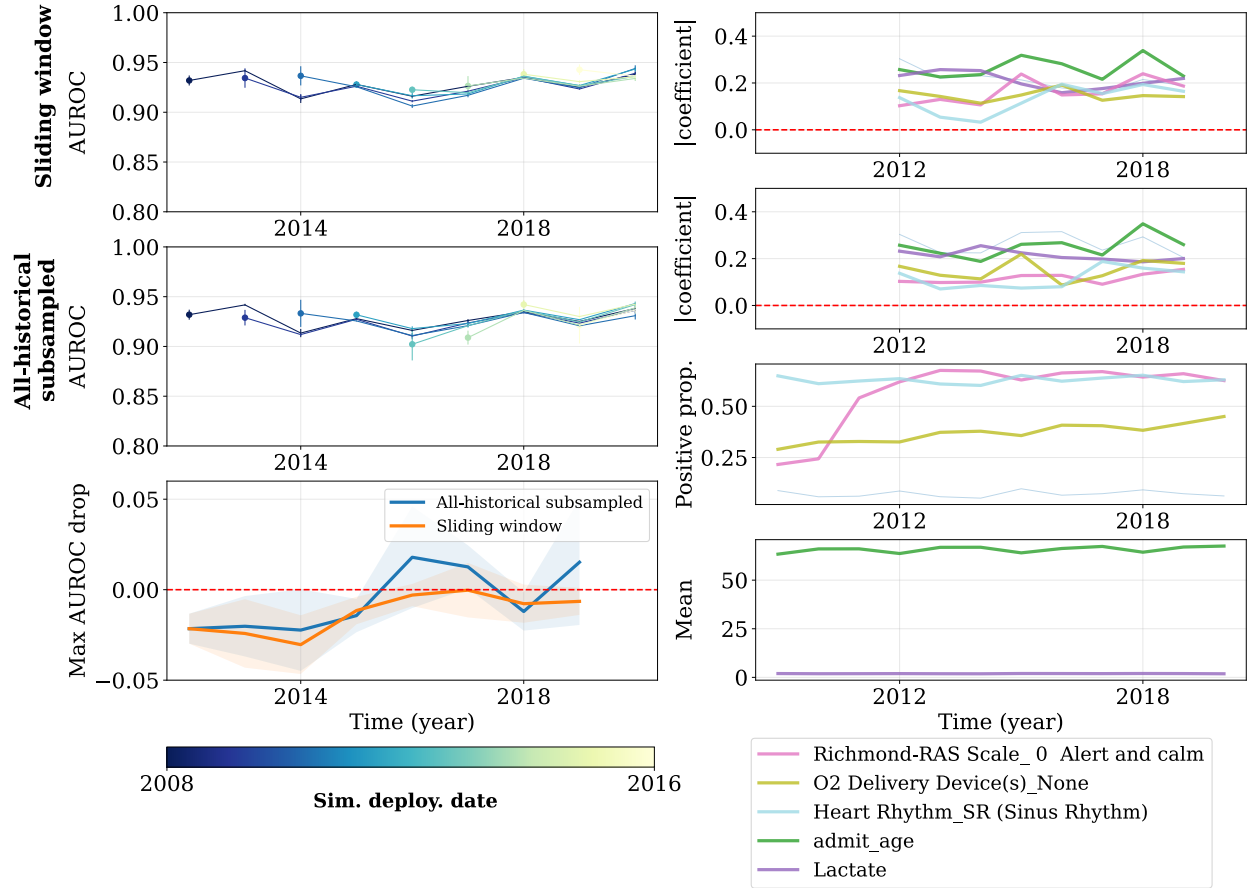

Figure 40: Diagnostic plot of MIMIC-IV. The important features are selected as the union of the top 3 features that have the highest absolute model coefficients. The left column includes AUROC versus time for both sliding window and all-historical subsampled, and the maximum AUROC drop for each trained model. The right column provides the absolute coefficients of each trained model from both regimes, and positive proportion of the significant features over time. The model performance is relatively stable, coinciding with relatively stable distributions of a majority of important features.



**J.7. OPTN (Liver)**

For OPTN (Liver) diagnostic plots, important features were selected using  $k = 3, p = 0.4, \Delta = 0.2$ .

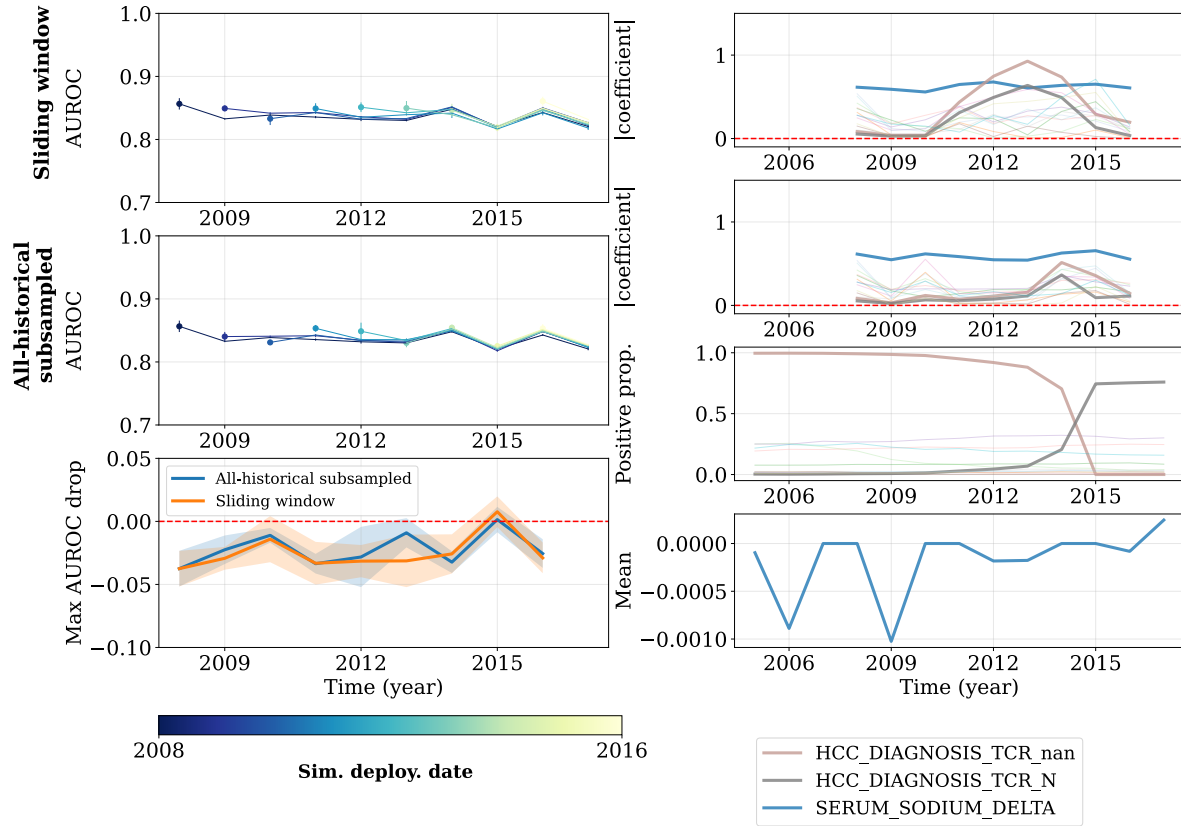

Figure 41: Diagnostic plot of OPTN (Liver). The important features are selected as the union of the top 3 features that have the highest absolute model coefficients. The left column includes AUROC versus time for both sliding window and all-historical subsampled, and the maximum AUROC drop for each trained model. The right column provides the absolute coefficients of each trained model from both regimes, and positive proportion of the significant features over time. Although the HCC DIAGNOSIS TCR binary features change in positive proportion over time, these features were not always important, and the other important features (faded) maintain relatively stable proportions across time. Overall, model performance is quite stable over time.

J.8. MIMIC-CXR

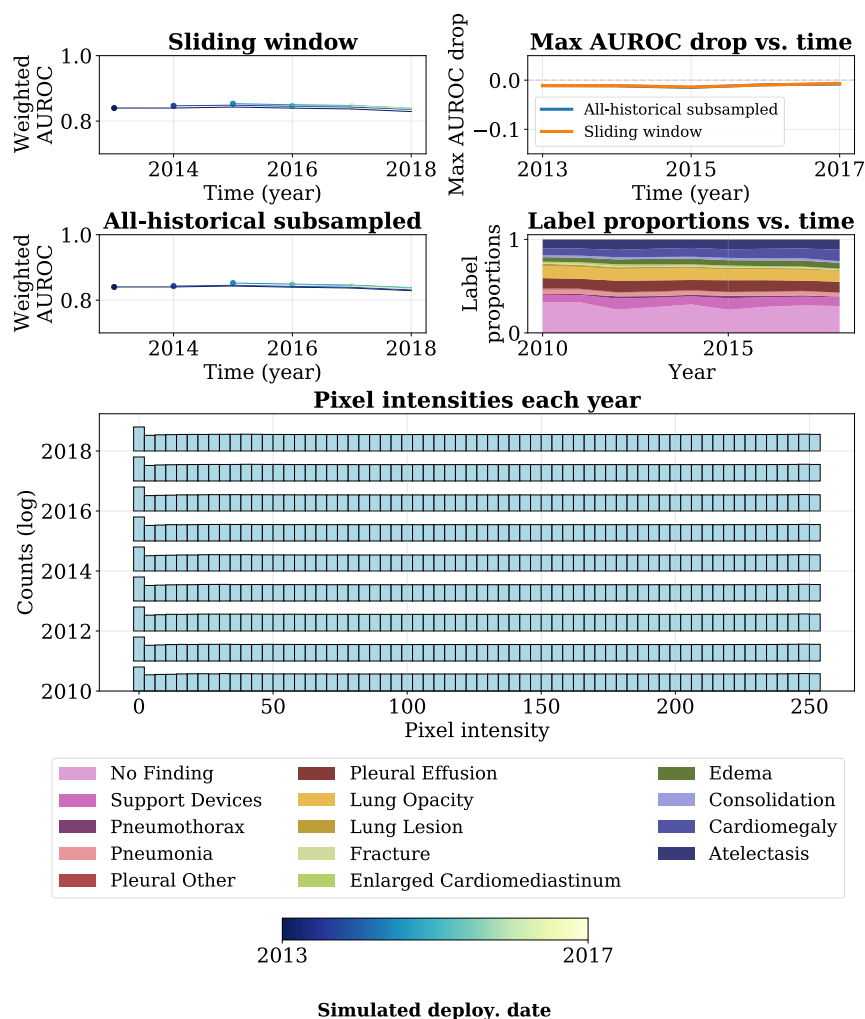

Figure 42: Diagnostic plot of MIMIC-CXR. The top and mid left includes AUROC versus time for both sliding window and all-historical subsampled. The top right is the maximum AUROC drop for each trained model. The mid-right provides the label proportions over time. The bottom shows pixel intensities for images in each year. The histogram of pixel intensity is stable over time, which is consistent with the small variation in model performance over time

## Appendix K. Model performance over time from three models

### K.1. AUROC

All plots in this section are for the all-historical training regime.

Test AUROC vs. Timepoint (year or month)

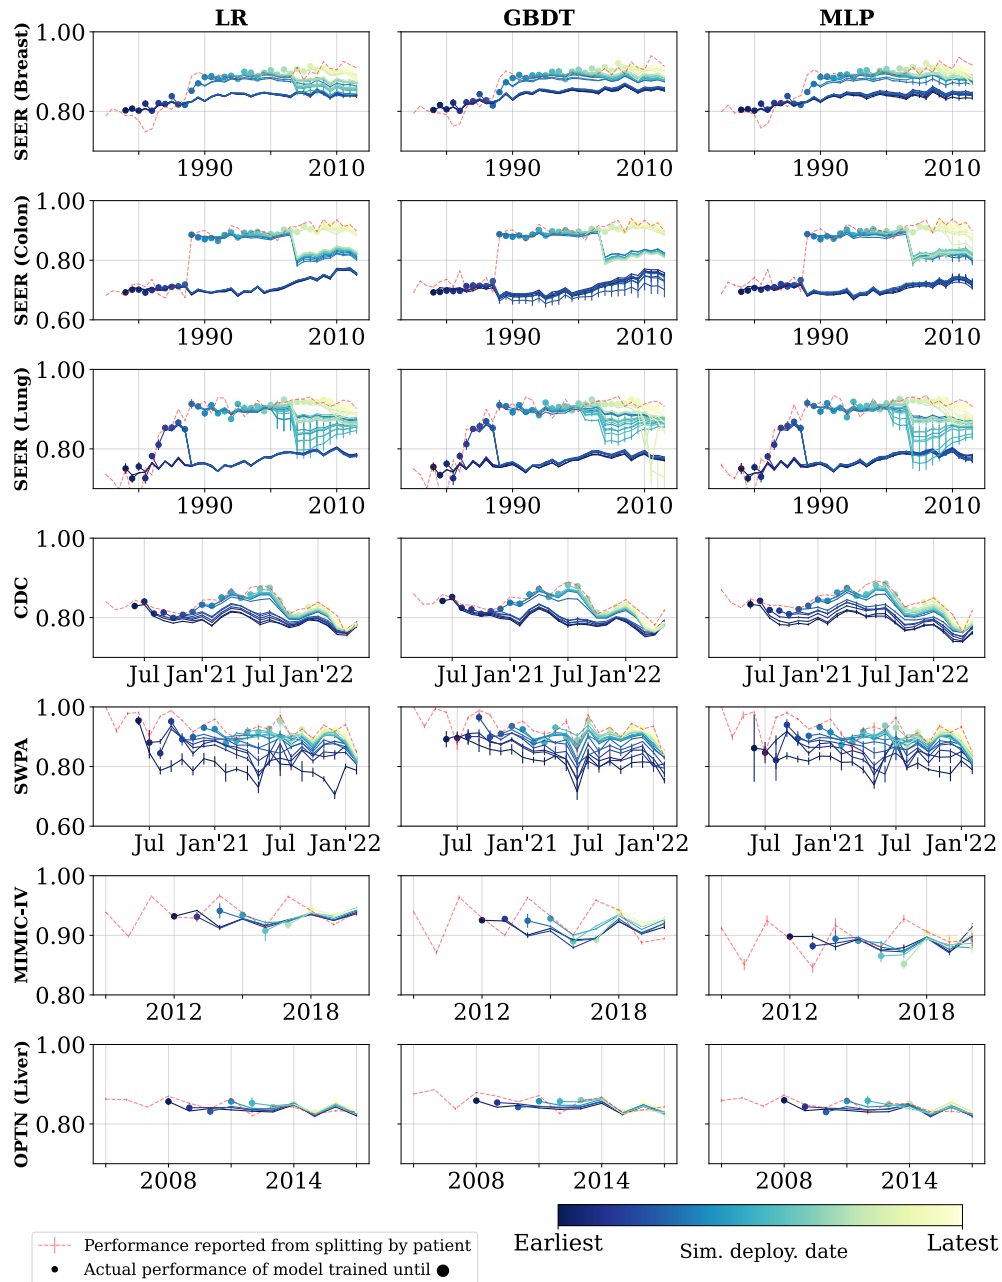

Figure 43: AUROC versus test timepoints from three model classes on all datasets.

**K.2. AUPRC**

All plots in this section are for the all-historical training regime.

Test AUPRC vs. Timepoint (year or month)

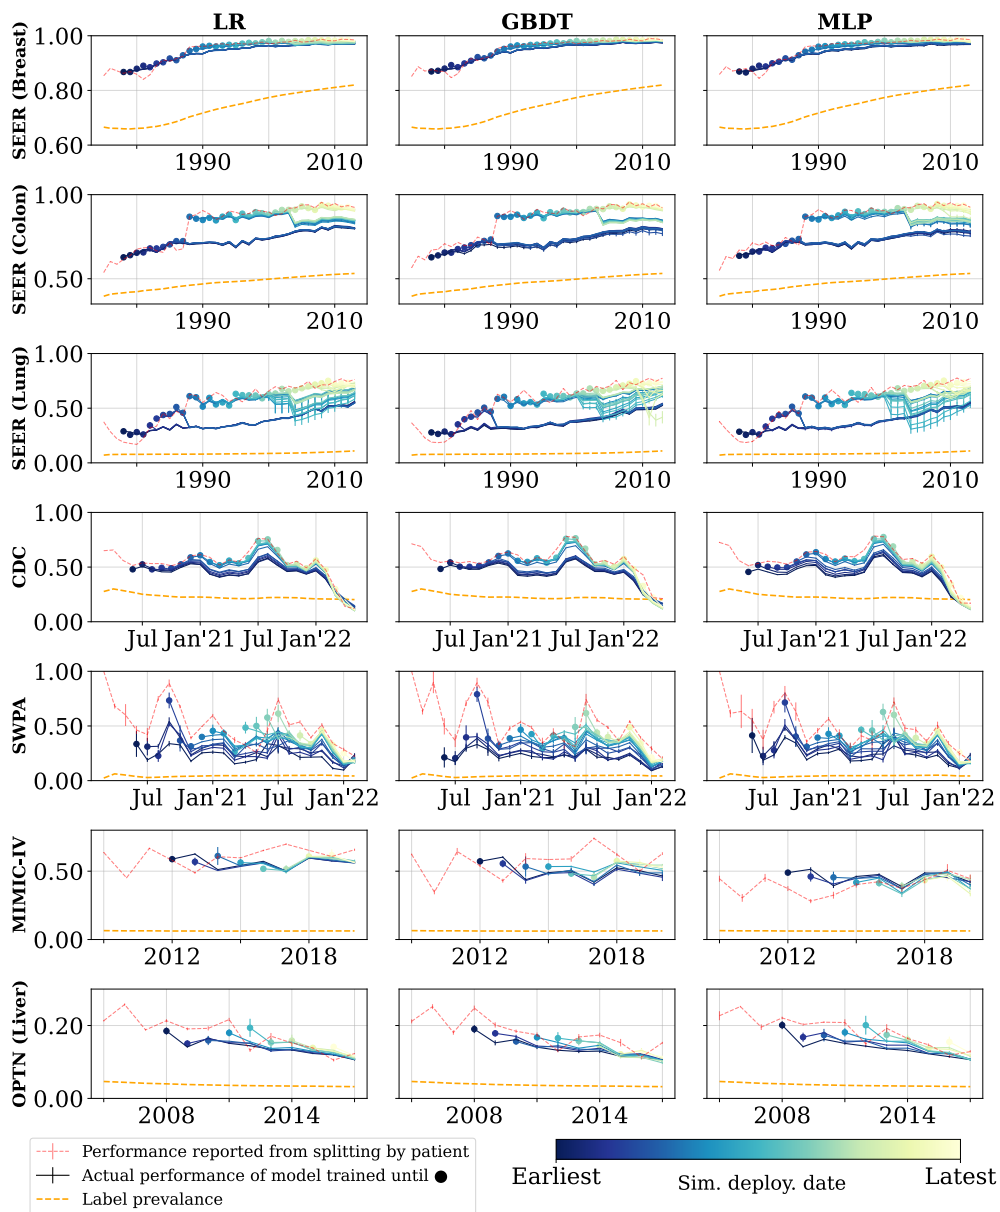

Figure 44: AUPRC versus test timepoints from three model classes on all datasets. Label prevalence refers to the ratio of accumulated positive labels over time.

## Appendix L. Data Split Details

Table 19: Split ratio for each dataset for training, validation and testing (both for time-agnostic splits and in-period splits).

| Dataset       | Split ratio   |
|---------------|---------------|
| SEER (Breast) | 0.8-0.1-0.1   |
| SEER (Colon)  | 0.8-0.1-0.1   |
| SEER (Lung)   | 0.8-0.1-0.1   |
| CDC COVID-19  | 0.8-0.1-0.1   |
| SWPA COVID-19 | 0.5-0.25-0.25 |
| MIMIC-IV      | 0.5-0.25-0.25 |
| OPTN (Liver)  | 0.5-0.25-0.25 |
| MIMIC-CXR     | 0.5-0.25-0.25 |

## Appendix M. Hyperparameter Grids

Table 20: Hyperparameter grids for model training.

| Parameter          | Values Considered                                   |
|--------------------|-----------------------------------------------------|
| <b>LR</b>          |                                                     |
| C                  | 0.01, 0.1, 1, 10, $10^2$ , $10^3$ , $10^4$ , $10^5$ |
| <b>GBDT</b>        |                                                     |
| n_estimators       | 50, 100                                             |
| max_depth          | 3, 5                                                |
| learning_rate      | 0.01, 0.1                                           |
| <b>MLP</b>         |                                                     |
| hidden_layer_sizes | 3, 5                                                |
| learning_rate_init | $10^{-4}$ , $10^{-3}$ , 0.01                        |

## Appendix N. AUROC from full-period training

Table 21: AUROC report from full-period training, the results are in format mean ( $\pm$ std. dev. across splits)

| Dataset       | Model    | Full-period AUROC     |
|---------------|----------|-----------------------|
| SEER (Breast) | LR       | 0.888 ( $\pm 0.002$ ) |
|               | GBDT     | 0.891 ( $\pm 0.002$ ) |
|               | MLP      | 0.891 ( $\pm 0.002$ ) |
| SEER (Colon)  | LR       | 0.863 ( $\pm 0.003$ ) |
|               | GBDT     | 0.868 ( $\pm 0.002$ ) |
|               | MLP      | 0.869 ( $\pm 0.003$ ) |
| SEER (Lung)   | LR       | 0.894 ( $\pm 0.002$ ) |
|               | GBDT     | 0.894 ( $\pm 0.002$ ) |
|               | MLP      | 0.898 ( $\pm 0.002$ ) |
| CDC COVID-19  | LR       | 0.837 ( $\pm 0.001$ ) |
|               | GBDT     | 0.851 ( $\pm 0.001$ ) |
|               | MLP      | 0.852 ( $\pm 0.002$ ) |
| SWPA COVID-19 | LR       | 0.928 ( $\pm 0.005$ ) |
|               | GBDT     | 0.930 ( $\pm 0.004$ ) |
|               | MLP      | 0.928 ( $\pm 0.006$ ) |
| MIMIC-IV      | LR       | 0.935 ( $\pm 0.003$ ) |
|               | GBDT     | 0.931 ( $\pm 0.002$ ) |
|               | MLP      | 0.898 ( $\pm 0.008$ ) |
| OPTN (Liver)  | LR       | 0.846 ( $\pm 0.005$ ) |
|               | GBDT     | 0.854 ( $\pm 0.005$ ) |
|               | MLP      | 0.847 ( $\pm 0.006$ ) |
| MIMIC-CXR     | DenseNet | 0.860 ( $\pm 0.001$ ) |
